# Supplementary material for: Antimicrobial resistance in urosepsis: outcomes from the multinational, multicenter global prevalence of infections in urology (GPIU) study 2003–2013
Source: Springer Nature journal article supplement (doi:10.1007/s00345-015-1722-1), 2015-12-11
Supplement: MOESM1 [file 8334444]

|                                                      |    |
|------------------------------------------------------|----|
| 1. Figures .....                                     | 2  |
| 2. Tables .....                                      | 7  |
| 3. CLASSIFICATION OF UTIS Within the GPIU Study..... | 8  |
| 3.1. Introduction .....                              | 8  |
| 3.2. Level of infection .....                        | 8  |
| 3.3. Grade of severity.....                          | 8  |
| 3.4. Pathogens .....                                 | 11 |
| 3.5. UTI Classification.....                         | 11 |

# 1. Figures

eFigure 1; GPIU Study conduct summary

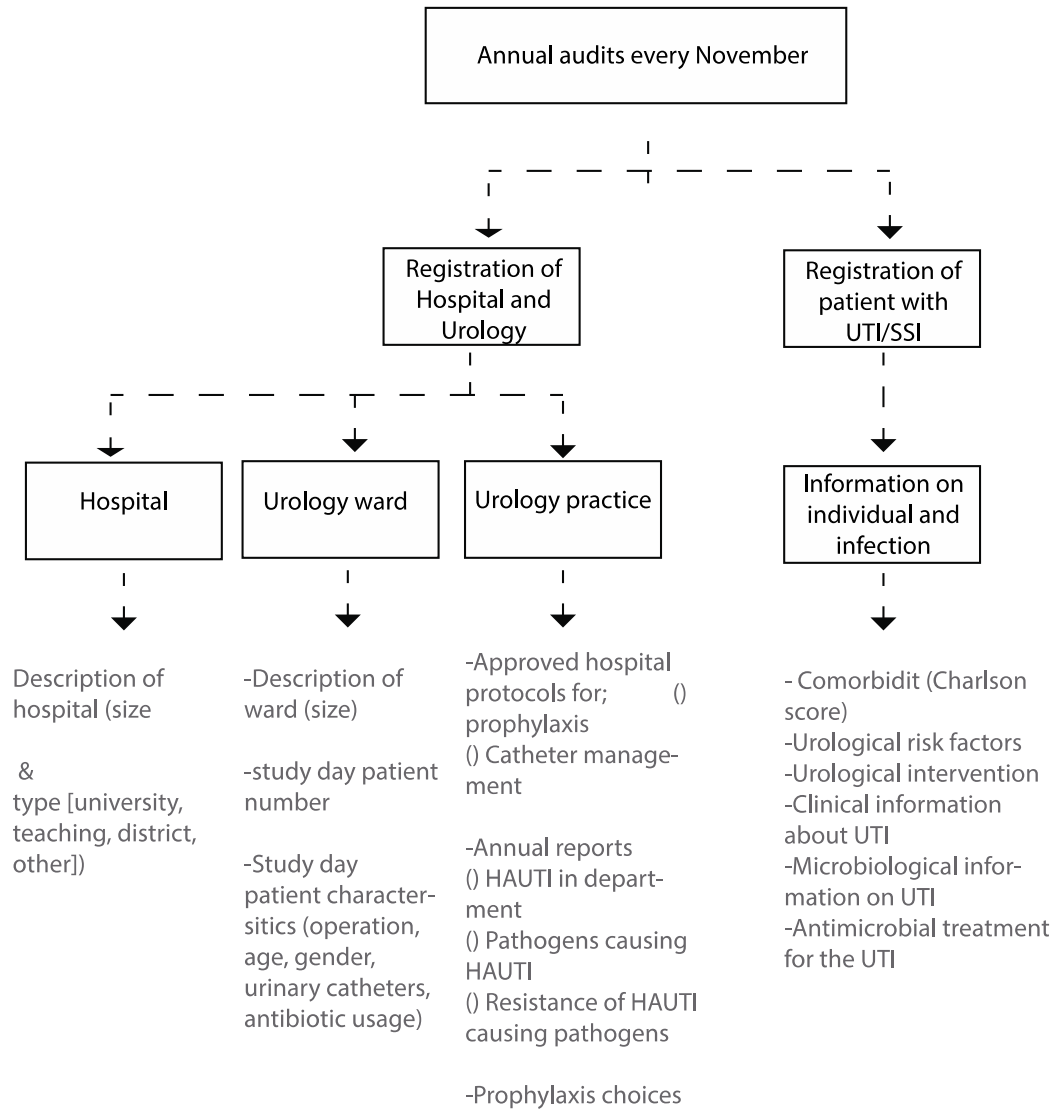

**eFigure 2. Patient/ case disposition.**

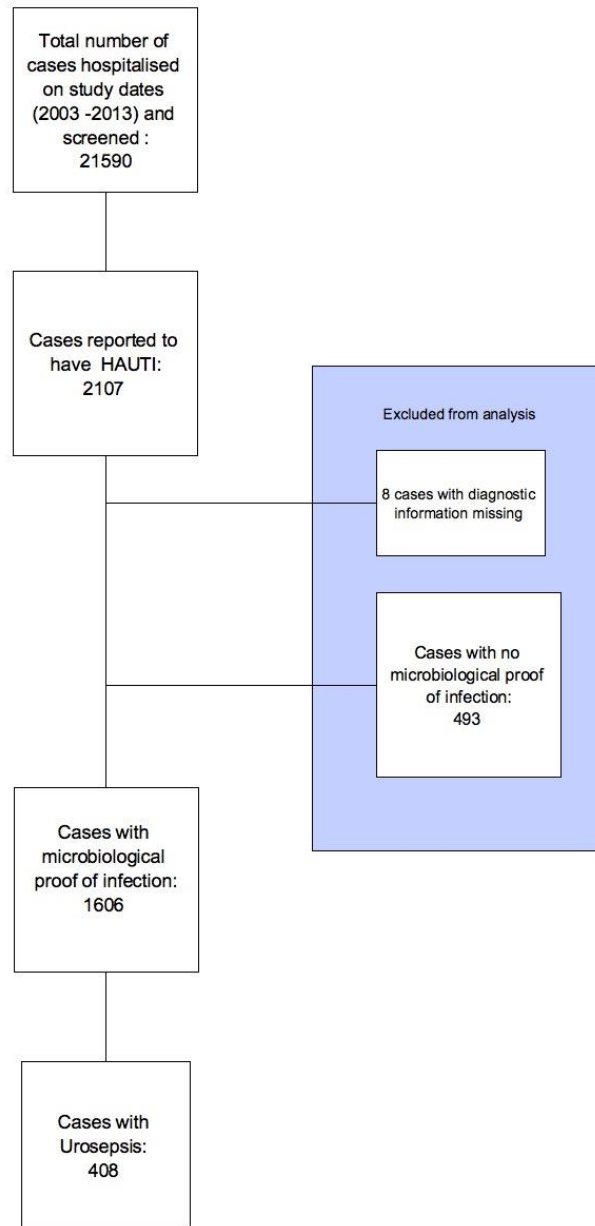

**eFigure 3; Statistical model structure.**

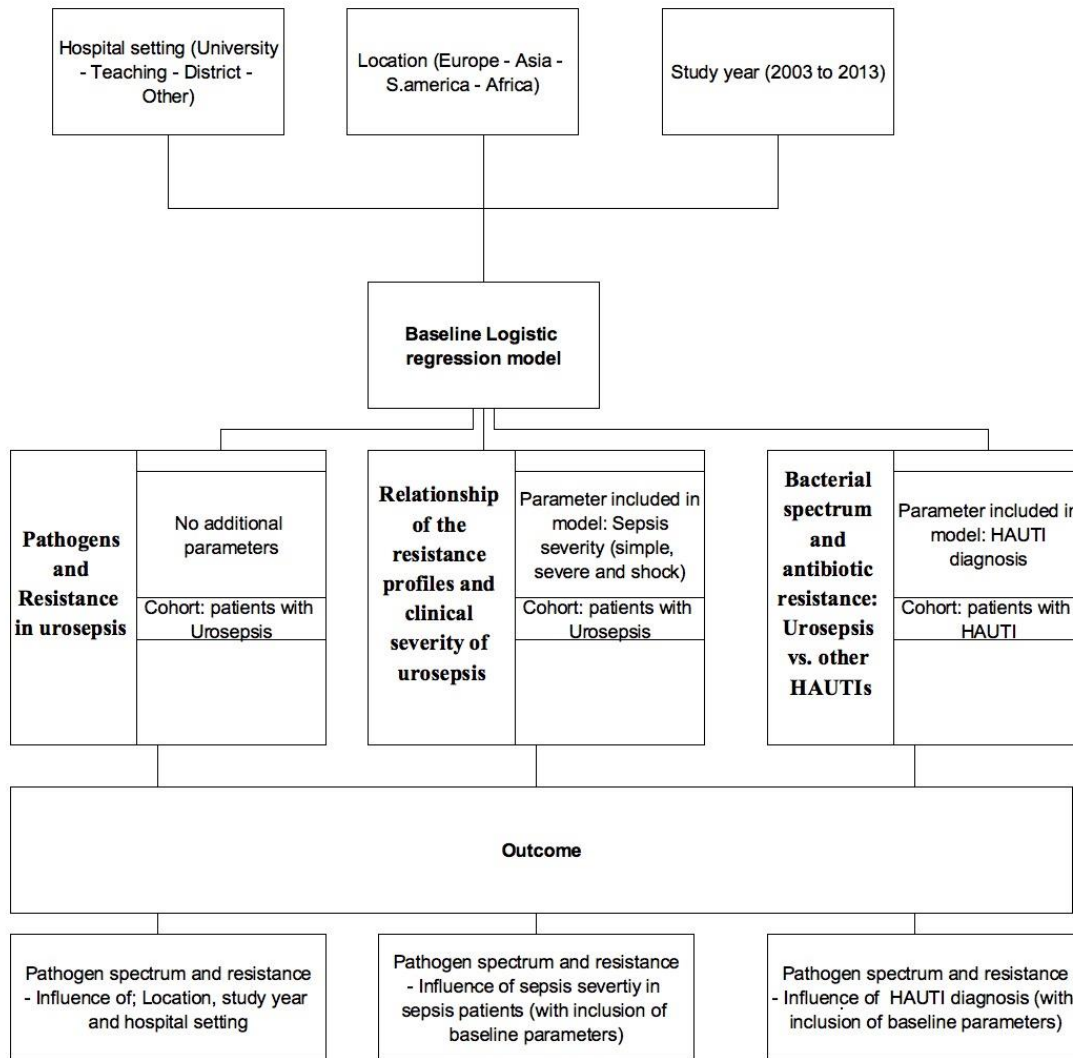

**eFigure 4, Overall frequency of pathogens in consecutive study years.**

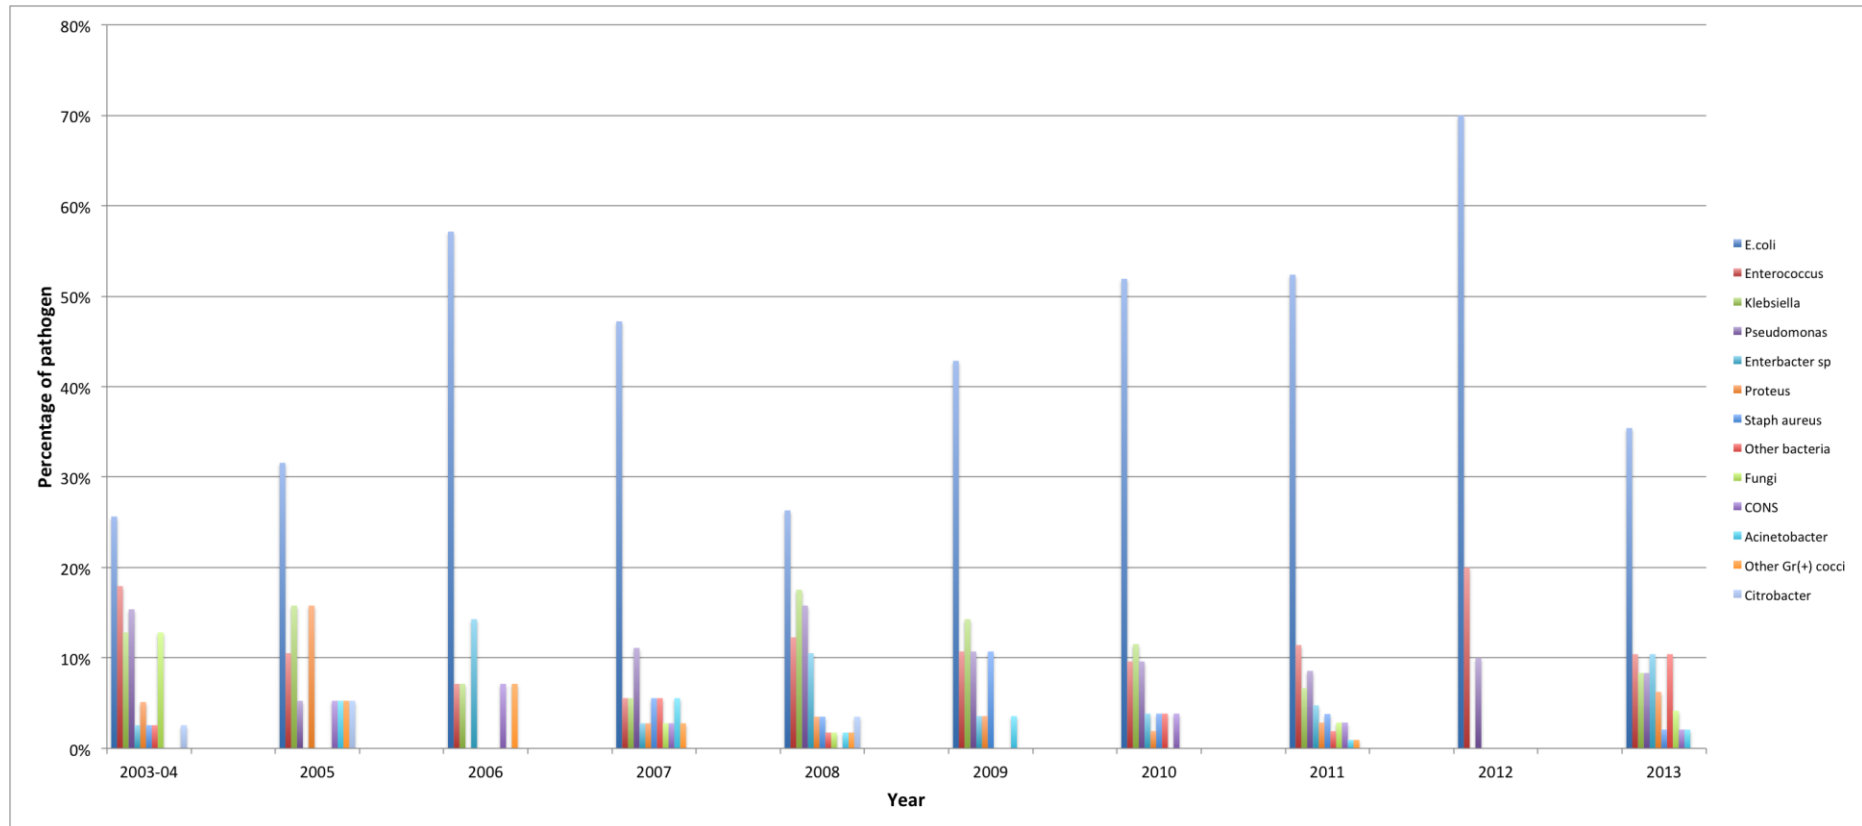

**(CoNS=Coagulase negative staphylococcus)**

**Fluctuations in the pathogen spectrum frequency can be observed. However, there is no time trend associated with these fluctuations (multiple logistic regression analysis, Likelihood-ratio p value>0.05)**

**eFigure-5, Annual resistance rates of antibiotics in urosepsis. Fluctuations in resistance can be seen, however on the overall 11-year time period a significant change was not identified.**

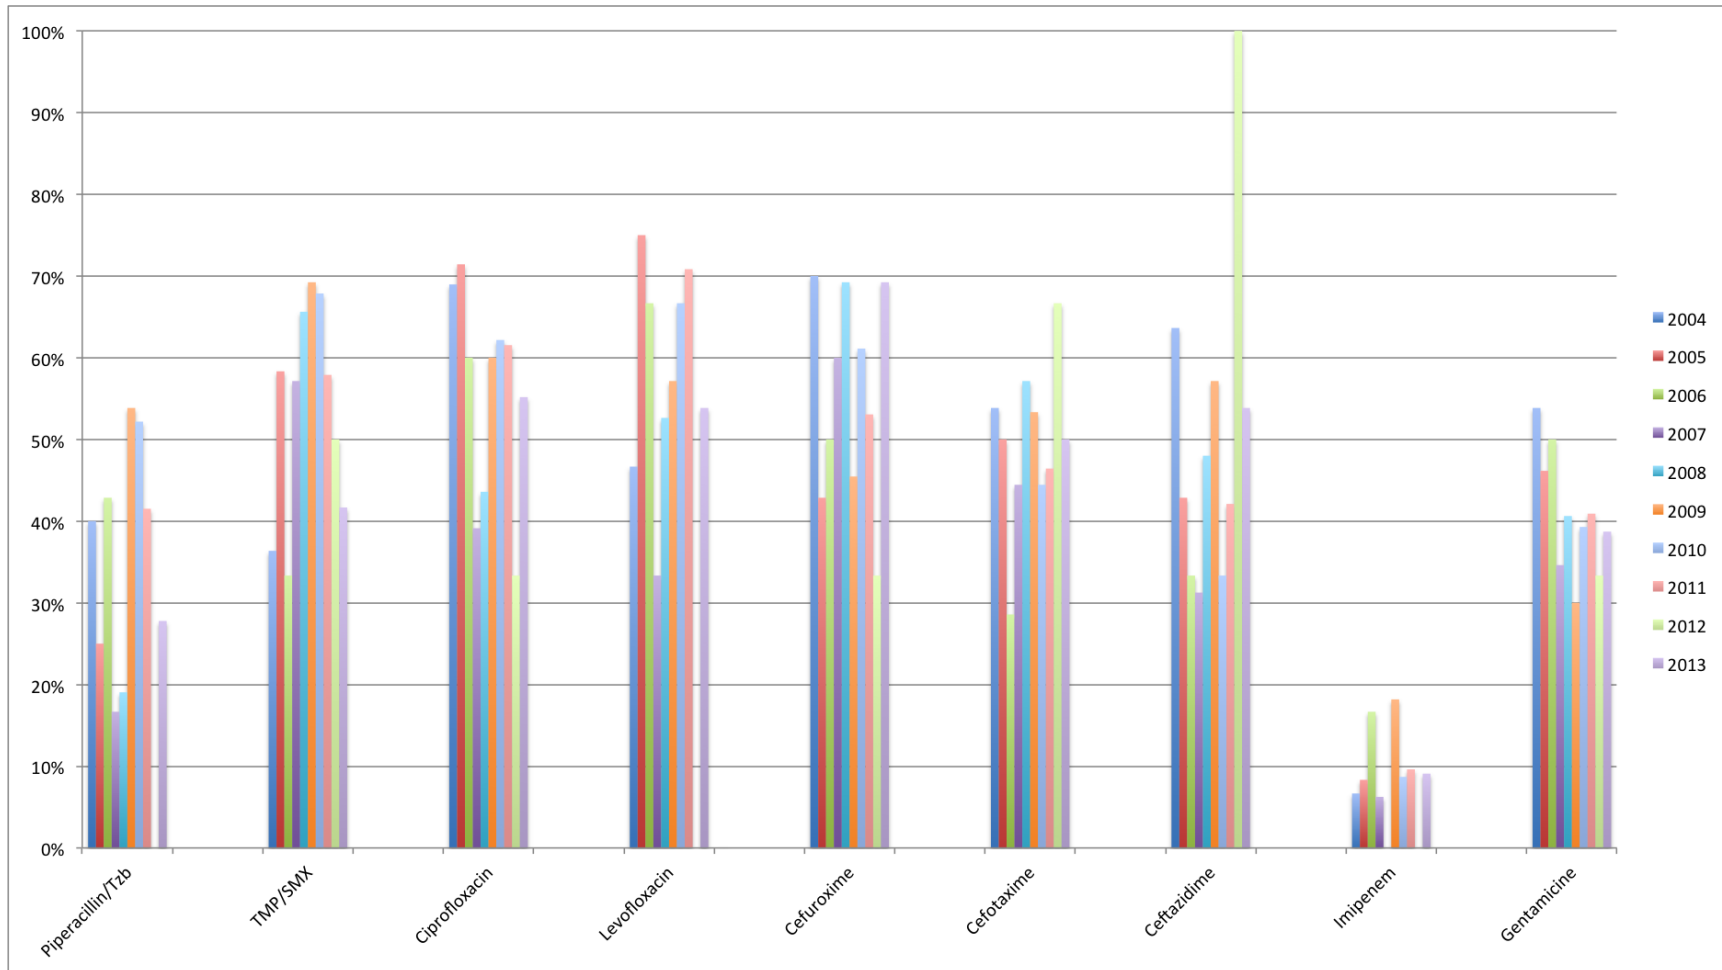

## 2. Tables

Table 1; Standards used for urine cultures susceptibility assessment in GPIU cohort

|              |     |       |
|--------------|-----|-------|
| NCCLS        | 874 | 54,4% |
| DIN          | 171 | 10,6% |
| EUCAS        | 166 | 10,3% |
| Other        | 241 | 15%   |
| Not provided | 154 | 9,5%  |

Table 2; Pathogens and antimicrobials recorded in GPIU study forms

| Pathogens                 | Antimicrobials                                                                                                                     |
|---------------------------|------------------------------------------------------------------------------------------------------------------------------------|
| <i>E. coli</i>            | Aminopenicillin (Ampicillin or Amoxicillin) in combination with a $\beta$ -lactamase inhibitor (BLI; Sulbactam or Clavulanic acid) |
| <i>Klebsiella spp.</i>    | Piperacillin in combination with Tazobactam                                                                                        |
| <i>S. aureus</i>          | Trimethoprim in combination with Sulfamethoxazole                                                                                  |
| <i>Proteus spp.</i>       | Ciprofloxacin                                                                                                                      |
| <i>Morganella spp.</i>    | Cefuroxime                                                                                                                         |
| <i>Enterobacter spp.</i>  | Cefotaxime                                                                                                                         |
| <i>Enterococcus spp.</i>  | Ceftazidime                                                                                                                        |
| <i>P.aeruginosa</i>       | Imipenem                                                                                                                           |
| CoNS                      | Gentamicin                                                                                                                         |
| <i>Citrobacter spp.</i>   |                                                                                                                                    |
| <i>Acinetobacter spp.</i> |                                                                                                                                    |
| Other Gram-(+) cocci      |                                                                                                                                    |
| Other bacteria            |                                                                                                                                    |
| <i>Candida albicans</i>   |                                                                                                                                    |
| Other Fungi               |                                                                                                                                    |

### **3. Classification of UTIs used in the GPIU Study**

#### ***3.1. Introduction***

Traditionally, UTIs are classified based on clinical symptoms, laboratory data, and microbiological findings. Practically, UTIs have been divided in uncomplicated and complicated UTIs, and sepsis. It is important to underline that the following proposed classification is still not validated or recognised. It is a working instrument.

A critical review of present classifications was undertaken for the EAU/ICUD Urogenital Infections initiative (1) in Appendix 16.1. The overall aim is to provide the clinician and researcher with a standardised tool and nomenclature for UTI. The present guidelines give a short summary of a tentative improved system of classification of UTI based on:

- anatomical level of infection;
- grade of severity of infection;
- underlying risk factors;
- microbiological findings.

The symptoms, signs and laboratory finding focus on the anatomical level and the degree of severity of the infection. The risk factor analysis contributes to define any additional therapeutic measure required (i.e. drainage).

#### **3.2. Level of infection**

The symptoms, as presented in the Appendix 16.1, focus on the level of infection, defined as:

- urethritis (UR);
- cystitis (CY);
- pyelonephritis (PN);
- sepsis (US).

Urethritis being poorly understood is for the time being not included in the algorithm and treatment strategy of pure UTI. The male genital infections prostatitis and epididymitis are also not included.

Asymptomatic bacteriuria (ABU) needs to be considered a special entity because it can have its source in both the lower and upper urinary tracts, and requires no treatment unless the patient is subjected to urological surgery.

#### **3.3. Grade of severity**



The grade of severity is set on a scale of 1-6 that is related to the risk of fatal outcome (Figure 1)

Figure 1: Traditional and improved classification of UTI as proposed by the EAU European Section of Infection in Urology (ESIU) (1)

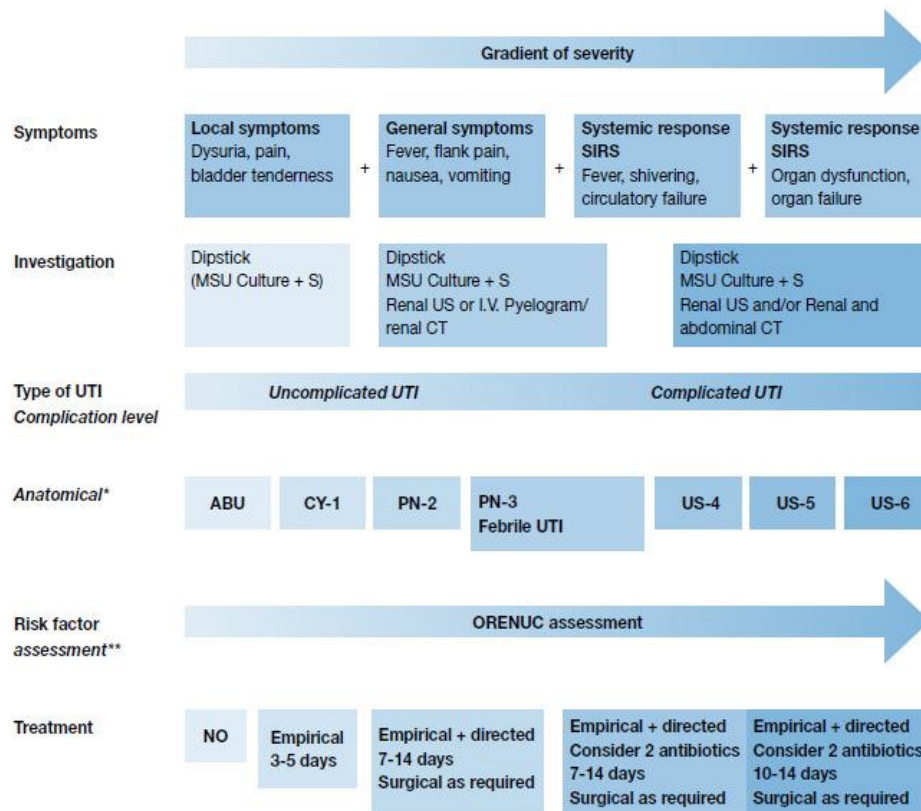

\* see Figure 2

\*\* see Table 1

Table 1: Host risk factors in UTI

| Type | Category of risk factor                                                                       | Examples of risk factors                                                                                                                                                                                               |
|------|-----------------------------------------------------------------------------------------------|------------------------------------------------------------------------------------------------------------------------------------------------------------------------------------------------------------------------|
| O    | No known/associated RF                                                                        | - Healthy premenopausal women                                                                                                                                                                                          |
| R    | RF of recurrent UTI, but no risk of severe outcome                                            | - Sexual behaviour and contraceptive devices<br><br>- Hormonal deficiency in post menopause<br><br>- Secretory type of certain blood groups<br><br>- Controlled diabetes mellitus                                      |
| E    | Extra-urogenital RF, with risk or more severe outcome                                         | - Pregnancy<br><br>- Male gender<br><br>- Badly controlled diabetes mellitus<br><br>- Relevant immunosuppression*<br><br>- Connective tissue diseases*<br><br>- Prematurity, new-born                                  |
| N    | Nephropathic disease, with risk of more severe outcome                                        | - Relevant renal insufficiency*<br><br>- Polycystic nephropathy                                                                                                                                                        |
| U    | Urological RF, with risk or more severe outcome, which can be resolved during therapy         | - Ureteral obstruction (i.e. stone, stricture)<br><br>- Transient short-term urinary tract catheter<br><br>- Asymptomatic Bacteriuria**<br><br>- Controlled neurogenic bladder dysfunction<br><br>- Urological surgery |
| C    | Permanent urinary Catheter and non resolvable urological RF, with risk of more severe outcome | - Long-term urinary tract catheter treatment<br><br>- Non resolvable urinary obstruction<br><br>- Badly controlled neurogenic bladder                                                                                  |

RF = Risk Factor; \* = not well defined; \*\* = usually in combination with other RF (i.e. pregnancy, urological intervention).

### 3.4. Pathogens

Urine culture will usually identify the causative pathogen ( $\geq 10^4$  cfu/mL) and its susceptibility pattern. Both characteristics can be introduced in the final classification of the clinical stage of infection. The degree of susceptibility is defined as grade a (susceptible) to c (resistant).

### 3.5. UTI Classification

Figure 2 shows a summary of the additive parameters that make up an individual class of UTI.

Figure 2: Additive parameters of UTI classification and severity assessment

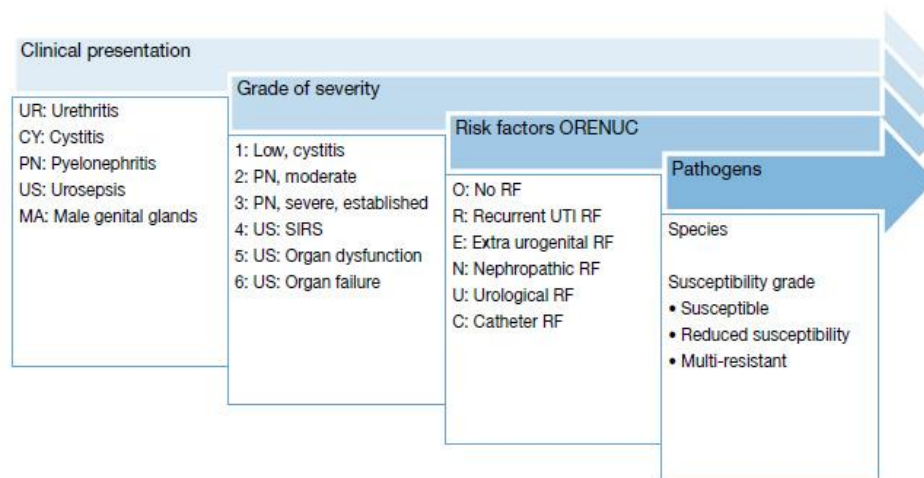

By cumulating the different parameters, a UTI can be classified as follows (1):

- CY-1R: *E. coli* (a): simple cystitis but recurrent with susceptibility to standard antibiotics.
- PN-3U: *K pneumonia* (b): severe pyelonephritis (with high fever and vomiting), with underlying urological disease (e.g. stones or obstruction) due to *Klebsiella sp.*, with a moderate antibiotic resistance profile.
- US-5C: *Enterococcus sp* (a): severe urosepsis with an antibiotic-sensitive *Enterococcus sp.* in a patient with an indwelling catheter.

#### 4. CDC Definitions **Used in the GPIU study for diagnosis of HAUTI**,<sup>1, 2, 3</sup>

##### Urinary Tract Infection

Urinary tract infection includes symptomatic urinary tract infection, asymptomatic bacteriuria, and other infections of the urinary tract.

**Symptomatic urinary tract infection** must meet one of the following criteria:

1. One of the following: fever ( $>38^{\circ}\text{C}$ ), urgency, frequency, dysuria, or suprapubic tenderness AND a urine culture\* of  $\geq 10^5$  colonies/ml urine with no more than two species of organisms
2. Two of the following: fever ( $>38^{\circ}\text{C}$ ), urgency, frequency, dysuria, or suprapubic tenderness AND any of the following:
  - i. Dipstick test positive for leukocyte esterase and/or nitrate
  - ii. Pyuria ( $\geq 10$  white blood cells (WBC)/ml or  $\geq 3$  WBC/high-power field of unspun urine)
  - iii. Organisms seen on Gram stain of unspun urine
  - iv. Two urine cultures with repeated isolation of the same uropathogen<sup>+</sup> with  $10^2$  colonies/ml urine in nonvoided specimens
  - v. Urine culture with  $\leq 10^5$  colonies/ml urine of single uropathogen in patient being treated with appropriate antimicrobial therapy
  - vi. Physician's diagnosis
  - vii. Physician institutes appropriate antimicrobial therapy
3. Patient  $\leq 12$  months of age has one of the following: fever ( $>38^{\circ}\text{C}$ ), hypothermia ( $<37^{\circ}\text{C}$ ), apnea, bradycardia, dysuria, lethargy, or vomiting AND urine culture of  $10^5$  colonies/ml urine with no more than two species of organisms
4. Patient  $\leq 12$  months of age has one of the following: fever ( $>38^{\circ}\text{C}$ ), hypothermia ( $>37^{\circ}\text{C}$ ), apnea, bradycardia, dysuria, lethargy, or vomiting AND any of the following:
  - i. Dipstick test positive for leukocyte esterase and/or nitrate
  - ii. Pyuria
  - iii. Organisms seen on Gram stain of unspun urine
  - iv. Two urine cultures with repeated isolation of same uropathogen with  $\geq 10^2$  organisms/ml urine in nonvoided specimens
  - v. Urine culture with  $\leq 10^5$  colonies/ml urine of a single uropathogen in patient being treated with appropriate antimicrobial therapy
  - vi. Physician's diagnosis
  - vii. Physician institutes appropriate antimicrobial therapy

**Asymptomatic bacteriuria** must meet either of the following criteria:

1. An indwelling urinary catheter is present within 7 days before urine is cultured AND patient has no fever ( $>38^{\circ}\text{C}$ ), urgency, frequency, dysuria or suprapubic tenderness AND has urine culture of  $10^5$  organisms/ml urine with no more than two species of organisms.
2. No indwelling urinary catheter is present within 7 days before the first of two urine cultures with  $\geq 10^5$  organisms/ml urine of the same organism with no more than two species of organisms, AND patient has no fever ( $>38^{\circ}\text{C}$ ), urgency, frequency, dysuria, or suprapubic tenderness.

**Other infections of the urinary tract** (kidney, ureter, bladder, urethra, or tissues surrounding the retroperitoneal or perinephric spaces) must meet one of the following criteria:

1. Organism isolated from culture of fluid (other than urine) or tissue from affected site

2. An abscess or other evidence of infection seen on direct examination, during surgery, or by histopathologic examination
3. Two of the following: fever( $>38^{\circ}\text{C}$ ), localized pain, or tenderness at involved site AND any of the following:
  1. Purulent drainage from affected site
  2. Organism isolated from blood culture
  3. Radiographic evidence of infection\*
  4. Physician's diagnosis
  5. Physician institutes appropriate antimicrobial therapy
4. Patient  $\leq 12$  months of age has one of the following: fever ( $>38^{\circ}\text{C}$ ), hypothermia ( $<37^{\circ}\text{C}$ ), apnea, bradycardia, lethargy, or vomiting AND any of the following:
  - i. Purulent drainage from affected site
  - ii. Organism isolated from blood culture
  - iii. Radiographic evidence of infection
  - iv. Physician's diagnosis
  - v. Physician instituted appropriate therapy

**\*For urine specimens to be of value in determining whether a nosocomial infection exists, they must be obtained aseptically using an appropriate technique, such as clean catch collection, bladder catheterization, or suprapubic aspiration.**

**+Gram-negative bacteria of Staphylococcus saprophyticus**

## 5. Clinical Diagnostic Criteria of Urosepsis and Uroseptic Shock **used in the GPIU study**

| Disorder           | Definition                                                                                                                                                                                                                                                                                                                                                                                                                                                                           |
|--------------------|--------------------------------------------------------------------------------------------------------------------------------------------------------------------------------------------------------------------------------------------------------------------------------------------------------------------------------------------------------------------------------------------------------------------------------------------------------------------------------------|
| Urosepsis (simple) | <p>Activation of a systemic inflammatory response syndrome (SIRS) due to a urinary tract infection (UTI). This systemic response is manifested by two or more of the following conditions:</p> <p>Temperature &gt; 38°C or &lt; 36°C</p> <p>Heart rate &gt; 90 beats min</p> <p>Respiratory rate &gt; 20 breaths/min or PaCO<sub>2</sub> &lt; 32mmHg (&lt; 4.3kPa)</p> <p>WBC &gt; 12,000 cells/mm<sup>3</sup> or &lt; 4,000 cells/mm<sup>3</sup> or ≥ 10% immature (band) forms</p> |
| Severe Urosepsis   | <p>Urosepsis associated with organ dysfunction, hypoperfusion or hypotension.</p> <p>Hypoperfusion and perfusion abnormalities may include but are not limited to lactic acidosis, oliguria or an acute alteration of mental status</p>                                                                                                                                                                                                                                              |
| Uroseptic Shock    | <p>Urosepsis with hypotension despite adequate fluid resuscitation along with the presence of perfusion abnormalities that may include, but are not limited to lactic acidosis, oliguria, or an acute alteration in mental status.</p> <p>Patients who are on inotropic or vasopressor agents may not be hypotensive at the time that perfusion abnormalities are measured</p>                                                                                                       |

## 6. References

1. Bjerklund Johansen T E, Botto H, Cek M, Grabe M et al. Critical review of current definitions of urinary tract infections and proposal of an ESU/ESIU classification system. *Internat J Antimicrob Agents* 2011;38S:64-70.
2. Horan TC, Andrus M, Dudeck MA. *CDC/NHSN surveillance definition of health care-associated infection and criteria for specific types of infections in the acute care setting*. *Am J Infect Control* 2008, 36(5): 309-32.
3. adjusted to urology: Naber KG, Schaeffer AJ, Heyns CF, Matsumoto T, Shoskes DA, Bjerklund Johansen TE (eds): *Urogenital Infections. European Association of Urology - International Consultation on Urological Diseases*, 1st edition 2010, Arnhem, The Netherlands, ISBN:978-90-79754-41-0

## **4. GPIU Investigators**

|                   |               |             |                  |                |
|-------------------|---------------|-------------|------------------|----------------|
| Christoph         |               | Zorn        | Konstanz         | Germany        |
| Muharrem          | Murat         | YILDIZ      | ANKARA           | Turkey         |
| Oleg              | Nickolay      | Zuban       | Saint-Petersburg | Russia         |
| Konstantinos      |               | Zougkas     | Rhodes           | Greece         |
| Jose Renato       | Ferreira      | Zottich     | Rio De Janeiro   | Brazil         |
|                   |               |             |                  | Serbia and     |
| Srdjan            | Dusan         | Zivojinov   | Novi Sad         | Montenegro     |
| Andrea            |               | Zitella     | Turin            | Italy          |
| Reinhold          | P             | Zimmermann  | Kufstein         | Austria        |
| Matthias          |               | Zimmermann  | Zurich           | Switzerland    |
| Nikolay           | Viktorovich   | Zhuravlev   | Krasnoobsk       | Russia         |
| Lan               | Ru            | Zhu         | Wuhan            | China          |
| Evisa             |               | Zhapa       | Tirana           | Albania        |
| Sde               | De CãfãjSsio  | Zequi       | Sao Paulo        | Brazil         |
| Bachar            |               | Zelhof      | Preston          | United Kingdom |
| Luis              | Rafael        | Zegarra     | Lima             | Peru           |
| Romuald           |               | Zdrojowy    | Warsaw           | Poland         |
| Sebastian         |               | Zbrun       | Bern             | Switzerland    |
| Andrey            | Vladimirovich | Zaytsev     | Moscow           | Russia         |
| Mihhail           |               | Zarkovski   | Tartu            | Estonia        |
| Gianpaolo         |               | Zanetti     | Milan            | Italy          |
| Morad             | Abdallh       | Zaki        | Sohag            | Egypt          |
| K                 | Kuruvilla     | Zachariah   | Ashington        | United Kingdom |
| Maher             | Fawzi         | Zabaneh     | Amman            | Jordan         |
| Muhammad          | Kabiru        | Yusuf       | Kano             | Nigeria        |
| Buhalov           | Yuri          | Yuri        | Kyiv             | Ukraine        |
| Ilkan             |               | Yuksel      | Edirne           | Turkey         |
| Abbas             |               | Yousefi Rad | Ankara           | Turkey         |
| Jeong             | Jae           | Young       | Inchun           | Korea, South   |
| Ma                |               | Yong        | Shandong         | China          |
| Gul               | Ruhsar        | Yilmaz      | Ankara           | Turkey         |
| Mustafa           |               | Yildirim    | Manisa           | Turkey         |
| Asif              |               | Yildirim    | Istanbul         | Turkey         |
| Wang              |               | Yi          | Shen Yang        | China          |
| Aydin             |               | Yenilmez    | Eskisehir        | Turkey         |
| Ozgur             |               | Yaycioglu   | Adana            | Turkey         |
| Ismet             |               | Yavascaoglu | Bursa            | Turkey         |
| Stephen Shei- Dei |               | Yang        | New Taipei City  | Taiwan         |
| Nguyen            | Dinh          | Xuong       | Ho Chi Minh      | Vietnam        |
| Chao              | Guan          | Xu          | Shiyan           | Armenia        |
| Yuan              |               | Xiaoyi      | Wuhan            | China          |
| Zhang             |               | Xiangbo     | Lanzhou          | China          |



|                 |              |                |                  |                |
|-----------------|--------------|----------------|------------------|----------------|
| Fiona           | Mei Wen      | Wu             | Singapore        | Singapore      |
| Eiling          |              | Wu             | Plymouth         | United Kingdom |
| Eric            | Roger        | Wroclawski     | Santo Andraja    | Brazil         |
| Slawomir        | Pawel        | Wozniak        | London           | United Kingdom |
| Ming Kui        |              | Wong           | W. P. Labuan     | Malaysia       |
| Gregory         | Johann       | Wirth          |                  | Switzerland    |
| Joerg           |              | Winkle         | Aschaffenburg    | Germany        |
| Anika           |              | Winkel         | Recklinghausen   | Germany        |
| Florian         | Thomas       | Wimpissinger   | Vienna           | Austria        |
| Simon           |              | Williams       | Derby            | United Kingdom |
| Jan             | Van Der      | Wijk           | STADSKANAAL      | Netherlands    |
| Thamara         |              | Wijesuriya     | Ragama           | Sri Lanka      |
| Jacqueline      |              | Wicht          | Brandenburg      | Germany        |
| Veronica        |              | Weterings      | Breda            | Netherlands    |
| Martin          |              | Westenfelder   | Krefeld          | Germany        |
| Peter           |              | Weib           | Siegen           | Germany        |
| Madhav          | Harihar      | Waze           | Panjim           | India          |
| Graham          | Michael      | Watson         | Near Polegate    | United Kingdom |
| Yi              |              | Wang           | Shengyang        | China          |
| Wei             |              | Wang           | Beijing          | China          |
| Mikala          |              | Wang           | Aarhus N         | Denmark        |
| Alexander       | Arkadievich  | Walsky         | Ninsk            | Belarus        |
| Raphaella       | Maria        | Waidelich      | Munich           | Germany        |
| Florian         | Martin Erich | Wagenlehner    | Giessen          | Germany        |
| Koichiro        |              | Wada           | Okayama          | Japan          |
|                 |              |                |                  | Serbia and     |
| Vinka           |              | Vukotic        | Belgrade         | Montenegro     |
| Chuyen          |              | Vu Le          | Ho Chi Minh      | Vietnam        |
| Le              | Nguyen       | Vu             | Hanoi            | Vietnam        |
|                 |              |                | Jablonec Nad     |                |
| Jaroslav        |              | Vseticka       | Nisou            | Czech Republic |
| Theodore        |              | Voudoukis      | Aeghion          | Greece         |
| Nikolay         | Andreevich   | Vorobyov       | Saint-Petersburg | Russia         |
| Martin          |              | Vorauer        | Baden            | Austria        |
| Martin          |              | Vorauer        | Baden            | Austria        |
| Friedrich       | Paul         | Von Toggenburg | St. Gallen       | Switzerland    |
| Bjoern          | Georg        | Volkmer        | Ulm              | Germany        |
| Thomas          | Daniel       | Vogt           | Ergolding        | Germany        |
| Martin          |              | Vogelsang      | Ulm              | Germany        |
| Yannis          |              | Vlamopoulos    | Lausanne         | Switzerland    |
| Starodoubtsevan | Nadia        | Vladimirovna   | Pervouralsk      | Russia         |
| Maltsev         | Andrey       | Vladimirovich  | Donetsk          | Ukraine        |
| Luchitskiy      |              | Vitaliy        | Kiyv             | Ukraine        |
| Jaspal          | S            | Virdi          | Harlow,Essex     | United Kingdom |
| Alexey          | Dmitrievich  | Vinokurov      | Saint-Petersburg | Russia         |
| Nataliya        | Andreevna    | Vinarova       | Moscow           | Russia         |

|            |             |               |              |                |
|------------|-------------|---------------|--------------|----------------|
| Brigitta   |             | Villumsen     | Holstebro    | Denmark        |
| Artsem     |             | Viliukha      | Minsk        | Belarus        |
| Angelo M.  |             | Viggiano      | Leon         | Spain          |
| Nguyen     | Phu         | Viet          | Hanoi        | Vietnam        |
| Alberto    |             | Vianello      | Perugia      | Italy          |
| Tibor      |             | Veszpremi     |              | Hungary        |
| Mr Prateek |             | Verma         | Eastbourne   | United Kingdom |
| Lisandro   | Ignacio     | Veliz         | Buenos Aires | Argentina      |
| Valia      | Valentinova | Veleva        | Sofia        | Bulgaria       |
| Muthu      | Veeramani   | Veeramani     | Nadiad       | India          |
| Zoltan     |             | Varga         | Sigmaringen  | Germany        |
| Gabriel    |             | Varga         | Brno         | Czech Republic |
| Marco      |             | Varaldo       | Genova       | Italy          |
| Paul       |             | Van Wijk      | Amsterdam    | Netherlands    |
| Jan        | Paul        | Van Haverbeke | Tielt        | Belgium        |
|            |             | Van Der Mee-  |              |                |
| Nathalie   |             | Marquet       | Tours        | France         |
| Michael    | Rogier      | Van Balken    | Arnhem       | Netherlands    |
| Mstislav   | Morozov     | Valentinovich | Smolensk     | Russia         |
| Haluk      |             | Vahaboglu     | Izmit        | Turkey         |
| Markku     | H           | Vaarala       | OYS          | Finland        |
| Nuray      |             | Uzun          | Istanbul     | Turkey         |
| Akylbek    | Ch.         | Usupbaev      | Bishkek      | Kyrgyzstan     |
| Enzo       |             | Usai          | Cagliari     | Italy          |
| Juan       |             | Uria          | Vic          | Spain          |
| Suleyman   | Erdinc      | Unluer        | Istanbul     | Turkey         |
| Dogan      |             | Unal          | Ankara       | Turkey         |
| Soner      |             | Ulusoy        | Istanbul     | Turkey         |
| Tomohiro   |             | Ueda          | Kyoto        | Japan          |
| Md Mohsin  |             | Uddin         | Dhaka        | Bangladesh     |
| Vasilios   |             | Tzortzis      | Larissa      | Greece         |
| Tahsin     |             | Turunc        | ADANA        | Turkey         |
| Bruce      |             | Turner        | London       | United Kingdom |
| Levent     | Niyazi      | Turkeri       | Istanbul     | Turkey         |
| Polat      |             | Turker        | Istanbul     | Turkey         |
|            |             |               |              | Serbia and     |
| Cane       | Dz          | Tulic         | Belgrade     | Montenegro     |
| Muzaffar   |             | Tukhtamishev  | Tashkent     | Uzbekistan     |
| Andrea     |             | Tubaro        | Rome         | Italy          |
| Anton      |             | Tsukanov      | Omsk         | Russia         |
| Nadiya     | Stepanivna  | Tselyukh      | Lviv         | Ukraine        |
| Petros     |             | Tsafrakidis   | Thessaloniki | Greece         |
| Urszula    | Grazyna     | Trykozko      | Warsaw       | Poland         |
| Andrej     |             | Trusila       | Minsk        | Belarus        |
| Tron       |             | Tronsen       | Levanger     | Norway         |

|            |           |                   |                  |                |
|------------|-----------|-------------------|------------------|----------------|
| Alberto    |           | Trinchieri        | Lecco            | Italy          |
| Yulia      | Pavel     | Trifonova         | Kiev             | Ukraine        |
| Khac Linh  |           | Tran Ngoc         | Ho Chi Minh City | Vietnam        |
| Nguyen     | Van       | Tran              | Cantho           | Vietnam        |
| Svetia     | Jordanov  | Toujarov          | Sofia            | Bulgaria       |
| Csaba      |           | Toth              | Debrecen         | Hungary        |
| Fettah     |           | Tosun             | Istanbul         | Turkey         |
| Gina       | Marcela   | Torres Zambrano   | Madrid           | Spain          |
| Joã£O      | Pimentel  | Torres            | Braga            | Portugal       |
| Jesus      | Ignacio   | Tornero           | Murcia           | Spain          |
| Mohamed    | Kotb      | Tolba             | Cairo            | Egypt          |
| Gokhan     |           | Toktas            | Istanbul         | Turkey         |
| Piero      | Giovanni  | Tognoni           | Bogliasco-Genoa  | Italy          |
| Ilker      |           | Tinay             | Siirt            | Turkey         |
| Marco      |           | Tiberi            | Trento           | Italy          |
| Yahya      | Tfeil     | Tfeil             | Nouakchott       | Mauritania     |
| Petr       |           | Tesar             | Praha 4          | Czech Republic |
| Peter      |           | Tenke             | Budapest         | Hungary        |
| Chu        | Leong     | Teh               | Georgetown       | Malaysia       |
|            |           |                   | Madinah          |                |
| Alaa       | Abdallah  | Tealab            | Menwarra         | Saudi Arabia   |
| Maria Fe   | Raymundo  | Tayzon            | Pasig City       | Philippines    |
| Meltem     |           | Tasbakan          | Izmir            | Turkey         |
| Msasanobu  |           | Tanimura          | Kochi-City       | Japan          |
| Neelam     |           | Taneja            | Chandigarh       | India          |
| Zafer      |           | Tandogdu          | Istanbul         | Turkey         |
| Kazushi    |           | Tanaka            | Kobe             | Japan          |
| Toomas     |           | Tamm              | Tallinn          | Estonia        |
| Arjana     |           | Tambic Andrasevic | Zagreb           | Croatia        |
| Perepanova | Sergeevna | Tamara            | Moscow           | Russia         |
| Nador      |           | Tamas             | Budapest         | Hungary        |
| Kaisar     | Ali       | Talukder          | Dhaka            | Bangladesh     |
| Satoshi    |           | Takahashi         | Sapporo          | Japan          |
| Koichi     |           | Takahashi         | Onga Gun         | Japan          |
| Hamid      | Reza      | Tajari            | Gorgan           | Iran           |
| Mehrdad    |           | Tahami            | Urmia            | Iran           |
| Ali        |           | Taghizade Afshari | Urmia            | Iran           |
| Rahim      | Razavi    | Taghavi           | Mashhad          | Iran           |
| Ferenc     | -         | Torzosk           | G.               | Hungary        |
| Ervin      |           | Szentgyorgyi      | Vac              | Hungary        |
| Tamas      |           | Szeberenyi        | Gyula            | Hungary        |
| Andras     |           | Szathmari         | Miskolc          | Hungary        |
| Istvan     |           | Szalay            | Szeged           | Hungary        |
| Zoltan     |           | Szabo             | Kecskemet        | Hungary        |
| Clare      |           | Sweeney           | Aberdeen         | United Kingdom |

|              |              |                  |                |                                            |
|--------------|--------------|------------------|----------------|--------------------------------------------|
| Joumana      | Issa         | Sunna            | Amman          | Jordan                                     |
| Paul Anthony | Lugue        | Sunga            | Quezon City    | Philippines                                |
| Fredrik      |              | Sunden           | Helsingborg    | Sweden                                     |
| Vesna        | D            | Suljagic         | Belgrade       | Serbia and Montenegro                      |
| Branislav    | Lazar        | SUBOTIC          | Brig           | Switzerland                                |
| Nazareno     |              | Suardi           | Milan          | Italy                                      |
| Sergiy       | Petrovych    | Styopushkin      | Dnipropetrovsk | Ukraine                                    |
| Viveka       | Diana        | Strock           | Goteborg       | Sweden                                     |
| Miroslav     | Milorad      | Stojadinovic     | Kragujevac     | Serbia and Montenegro                      |
| Ingunn       |              | Steingrimsdottir | Reykjav  f  k  | Iceland                                    |
| Dan          |              | Stefanescu       | Bistrita       | Romania                                    |
| Sotir        |              | Stavridis        | Skopje         | Macedonia, The Former Yugoslav Republic of |
| Vladimir     |              | Startsev         | St.-Petersburg | Russia                                     |
| Lesnikov     | Vladimir     | Stanislavovich   | Donetsk        | Ukraine                                    |
| Maria        | Ines         | Staneloni        | Buenos Aires   | Argentina                                  |
| Roman        |              | Stanek           | Opava          | Czech Republic                             |
| Konstantinos |              | Stamatiou        | Pireas         | Greece                                     |
| Pia          |              | Stallenberg      | Amsterdam      | Netherlands                                |
| Annabelle    |              | Stainier         | Yvoir          | Belgium                                    |
| Christopher  |              | Springer         | Vienna         | Austria                                    |
| Annabel      |              | Spek             | Meiningen      | Germany                                    |
| Bj  f  Rn    |              | Specht           | Stuttgart      | Germany                                    |
| Hajrudin     |              | Spahovic         | Sarajevo       | Bosnia and Herzegovina                     |
| Philipp      | Julian       | Spachmann        | Regensburg     | Germany                                    |
| Petros       |              | Sountoulides     | Veria          | Greece                                     |
| Michelangelo |              | Sorrentino       | Napoli         | Italy                                      |
| J  f  Rg     |              | Sommer           | Lohne          | Germany                                    |
| Gyorgy       | -            | Solt             | Harlow         | United Kingdom                             |
| Thong        |              | Sok Hean         | Phnom Penh     | Cambodia                                   |
| Maja         |              | Sofronievska     |                | Macedonia, The Former Yugoslav Republic of |
| Mustafa      |              | Glavinov         | Skopje         | Republic of                                |
| Doddy        | M.           | Sofikerim        | Kayseri        | Turkey                                     |
| Chavdar      | Krumov       | Soebadi          | Surabaya       | Indonesia                                  |
| Aliaksandr   |              | Slavov           | Sofia          | Bulgaria                                   |
| Liubov       | Alexandrovna | Sivets           | Minsk          | Belarus                                    |
| Rachhpal     | S            | Sinyakova        | Moskow         | Russia                                     |
| Avinash      | Kumar        | Singh            | Amritsar       | India                                      |
| Dorin        |              | Singh            | Sofia          | Bulgaria                                   |
| Orhun        |              | Singeorzan       | Miercurea Ciuc | Romania                                    |
|              |              | Sinanoglu        | Istanbul       | Turkey                                     |

|                  |                |                  |                   |                |
|------------------|----------------|------------------|-------------------|----------------|
| Battisti         |                | Simon            | La Roche Sur Yon  |                |
| Adrian           | Diego          | Simoes           | Cedex 9           | France         |
| Ricardo          | Pereira E      | Silva            | Canterbury        | United Kingdom |
| Yoram            | Itchak         | Siegel           | Lisboa            | Portugal       |
| Marcin           |                | Sieczkowski      | Zerifin           | Israel         |
| Maksim           |                | Sidorenko        | Gdansk            | Poland         |
| Babu Vijayakumar |                | Sidharaju        | Kiev              | Ukraine        |
| Alexander        | Vladislavovich | Shuliak          | Salem             | India          |
| Mitra            |                | Shodjai-Baghini  | Kiev              | Ukraine        |
| Takehiko         |                | Sho              | Vienna            | Austria        |
| Dimiter          | Grigorov       | Shishkov         | Kitakyushu        | Japan          |
| Bongsuk          |                | Shim             | Plovdiv           | Bulgaria       |
| Katsumi          |                | Shigemura        | Seoul             | Korea, South   |
| Alexey           | Alexandrovich  | Shevyrin         | Kobe              | Japan          |
| Amir             | Hossein        | Sharafi          | Ivanovo           | Russia         |
| Sergey           | Nikolaevich    | Shamrayev        | Urumia            | Iran           |
| Hassan           | Sayed          | Shaker           | Donetsk           | Ukraine        |
|                  |                |                  | Cairo             | Egypt          |
|                  |                |                  |                   | Serbia and     |
| Mimoza           | Ekrem          | Shaipi           | Presevo           | Montenegro     |
| Syed             | Ali            | Shahzad          | SLOUGH            | United Kingdom |
| Garnik           |                | Shahbazyan       | Yerevan           | Armenia        |
| Nexhat           | Emin           | Shabani          | Gjilan/Kosovo     | Albania        |
| Stavros          | Fotios         | Sfoungaristos    | Karpathos         | Greece         |
| Musteba          |                | Sevil            | Afyon             | Turkey         |
| Joanne           | Slyth          | Serrano Uribe    | Alcala De Henares | Spain          |
| Alexander        | Alexandrovitch | Seriogin         | Moscow            | Russia         |
| Maroun           |                | SERHAL           | Beirut            | Lebanon        |
| Anup             |                | Sengupta         | Bury St. Edmunds  | United Kingdom |
| Yavor            | Petrov         | Semerdzhev       | Sofia             | Bulgaria       |
| Mehmet           | Bulent         | Semerci          | Izmir             | Turkey         |
| Oscar            |                | Selvaggio        | Matera            | Italy          |
| Ilker            |                | Seckiner         | Gaziantep         | Turkey         |
| Dr..Joseph       | Philipraj      | Sebastian        | Gangtok           | India          |
| Alessandro       |                | Sciarra          | Rome              | Italy          |
| Bernhard         | Michael        | Schwindl         | Weiden            | Germany        |
| Martin           |                | Schoenthaler     | Freiburg          | Germany        |
| Stefan           |                | Schoeler         | Mãfâ¼Nchen        | Germany        |
| Ludvik           |                | Schnitzer        | Praha 4           | Czech Republic |
| Marcus           |                | Schenck          | Essen             | Germany        |
| Markus           |                | Schãffer         | Coburg            | Germany        |
| Markus           |                | SchãfferFer      | Coburg            | Germany        |
|                  |                |                  | Garmisch-         |                |
| Sabrina          |                | Schaeffer        | Partenkirchen     | Germany        |
| Markus           |                | Schãffer¶Nberger | K.                | Germany        |
| Anthony          | J              | Schaeffer        | Chicago           | United States  |

|                  |            |                   |                  |                |
|------------------|------------|-------------------|------------------|----------------|
| Roberto          | Mario      | Scarpa            | Orbassano        | Italy          |
| Ariel            | Gustavo    | Scafuri           | Fortaleza, Ceara | Brazil         |
| Mark             | Fraser     | Saxby             | Stoke-On-Trent   | United Kingdom |
| Savvas           | Tryfon     | Savvaïdis         | Argos            | Greece         |
| Orlin            |            | Savov             | Nuremberg        | Germany        |
|                  |            |                   | Bandar Seri      |                |
| Muppidi          |            | Satyavani         | Bagawan          | Brunei         |
| Karen            |            | Sarkisyan         | Saint-Petersburg | Russia         |
| Mehrdad          |            | Sareh             | Bucharest        | Romania        |
| Rosanna          | Tube       | Santillan         | Makati City      | Philippines    |
| Sandro           | Danilo     | Sandri            | Magenta          | Italy          |
| Gecs             |            | Sandor            | Veszprãfâ©M      | Hungary        |
| Susanna          | Malin      | Sandberg          | Karlstad         | Sweden         |
| Murat            |            | Samli             | Afyon            | Turkey         |
| Hassan           | Mikhael    | Saloum            | Riyadh           | Saudi Arabia   |
| Ahmed            |            | Salman            | Lahore           | Pakistan       |
| Sataa            |            | Sallami           | Tunis            | Tunisia        |
| Hosni            | Khairy     | Salem             | Cairo            | Egypt          |
| Mohammad         |            | Salehi            | Rasht            | Iran           |
| Leonardo         | Mose       | Salame            | Cefalu (Palermo) | Italy          |
| Morshed          | Ali        | Salah             | Al Wakra         | Qatar          |
| Vasileios        | I          | Sakalis           | Thessaloniki     | Greece         |
| Radhia           |            | Saidi             | Monastir         | Tunisia        |
| Kapil            |            | Sahnan            | Gloucestershire  | United Kingdom |
| Tayfun           | -          | Sahinkanat        | Kahramanmaras    | Turkey         |
| Hayrettin        |            | Şahin             | Diyarbakir       | Turkey         |
| Erkin            |            | Saglam            | Istanbul         | Turkey         |
| Ahmed            | S          | Safwat            | Assiut           | Egypt          |
| Refat            | Abdelsamie | Sadeq             | Zagazig          | Egypt          |
| Nourkhoda        |            | Sadeghifard       | Ilam             | Iran           |
| Emilio           |            | Sacco             | Roma             | Italy          |
| Brookman-Amissah |            | Sabine            | Weiden           | Germany        |
| Sherif           | Helmy      | Saafan            | Cairo            | Egypt          |
| M                | M          | S                 | Fayoum           | Egypt          |
| Emile            |            | Rwamasirabo       | Kigali           | Rwanda         |
| Andras           |            | Rusz              | Giessen          | Germany        |
| Annebeth         |            | Ruiter            | Nieuwegein       | Netherlands    |
| Robert           | Raimund    | Rudolph           | Kirchheim        | Germany        |
| Levente          |            | Rosztãfã³Czy      | Baja             | Hungary        |
| Ãfã Gnes         |            | Rosecker          | Szeged           | Hungary        |
| Basilisk,        | E          | Rompis            | Thessalonians    | Greece         |
| Imre             |            | Romics            | Budapest         | Hungary        |
| Alfonso          | J.         | Rodriguez-Morales | Trujillo         | Venezuela      |
| Viviana          | M.         | Rodriguez         | Buenos Aires     | Argentina      |
| Cruz             | N.         | Rodriguez         | Caracas          | Venezuela      |
| Raul             | Nunes      | Rodrigues         | Angra Do         | Portugal       |

|             |              |                   |                |                 |
|-------------|--------------|-------------------|----------------|-----------------|
| Rafael      |              | Rodrigues-Patraja | Heroismo       |                 |
| Grãfâ©Goire |              | Robert            | Madrid         | Spain           |
| Torsten     |              | Rith              | Bordeaux       | France          |
|             |              |                   | Erlangen       | Germany         |
|             |              |                   |                | Macedonia, The  |
|             |              |                   |                | Former Yugoslav |
| Slobodan    | Petar        | Ristovski         | Skopje         | Republic of     |
| Pedro       | M.           | Rifakis           | Caracas        | Venezuela       |
| Mehmet      | Murat        | Rifaioglu         | Istanbul       | Turkey          |
|             |              |                   | Garmisch-      |                 |
| Hanna       | Juliane      | Richter           | Partenkirchen  | Germany         |
| Carlos      |              | Ribeiro Oliveira  | Braga          | Portugal        |
| Theo        | M            | Reijke De         | Amsterdam      | Netherlands     |
| Imre        |              | Regos             | Vac            | Hungary         |
|             |              |                   | Libertador San |                 |
| Harold      | M            | Red               | Martin         | Argentina       |
| Nouri       |              | Rebai             | Paris          | France          |
| Couti       |              | Razvan            | Cluj-Napoca    | Romania         |
| Dr          | Syed Johar   | Raza              | Karachi        | Pakistan        |
| Raul        |              | Raz               | Afula          | Israel          |
| Mark        |              | Rauthmann         | Sigmaringen    | Germany         |
| Erika       |              | Rauth             | Pecs           | Hungary         |
| Deepak      | Babu         | Rauniyar          | Dhulikhel      | Nepal           |
| Aso         | Omer         | Rashed            | Sulaimani      | Iraq            |
| P.N.        |              | Rao               | Manchester     | United Kingdom  |
| Muhammad    | Qamar Sarwar | Rana              | Birmingham     | United Kingdom  |
| Anders      |              | Ramsing           | VãfâRnamo     | Sweden          |
| Rodrigo     | Nuno Brito   | Ramos             | Lisboa         | Portugal        |
| Duje        |              | Rako              | Zagreb         | Croatia         |
| Lul         |              | Raka              | Prishtina      | World           |
| Hary Raj    |              | Raja              | Blackburn      | United Kingdom  |
| Syed        | Imtiaz       | Rahman            | Newport        | United Kingdom  |
| Aino        |              | Rãfãµãfãµm        | Tallinn        | Estonia         |
| Muhammad    |              | Rafique           | MULTAN         | Pakistan        |
|             |              |                   |                | Serbia and      |
| Lili        |              | Radulovic         | Belgrade       | Montenegro      |
| Sabri       |              | Rachid            | Casablanca     | Morocco         |
|             |              |                   | Garmisch       |                 |
| Bryan       | Ingemar      | Qvick             | Partenkirchen  | Germany         |
| Ana Isabel  | Linares      | Quevedo           | Madrid         | Spain           |
| Tahir       | Uddin        | Qazi              | Kohat          | Pacific Ocean   |
| Wasim       |              | Qasim             | Dalian         | China           |
| Ralf        |              | Pychynski         | Bad Segeberg   | Germany         |
| Armin       |              | Pycha             | Bolzano        | Italy           |
| Praveen     |              | Pushkar           | New Delhi      | India           |
| Basuki      | B            | Purnomo           | Malang         | Indonesia       |

|              |           |                   |                  |                      |
|--------------|-----------|-------------------|------------------|----------------------|
| Tiziana      |           | Puglisi           | Ispica           | Italy                |
| Ignacio      |           | Puche-Sanz        | Granada          | Spain                |
| Petr         |           | Prosvic           | Nachod           | Czech Republic       |
| Jose-Vicente | Tablante  | Prodigalidad      | Quezon City      | Philippines          |
| Jose         | Nestor    | Procuna Hernandez | Mexico D.F.      | Mexico               |
| Domenico     |           | Prezioso          | Naples           | Italy                |
| Juan         | Manuel    | Poyato            | Huelva           | Spain                |
| Mariela      | Rosa      | Pow-Sang          | Lima             | Peru                 |
| Tobias       | Samuel    | Pottek            | Wedel            | Germany              |
| Martina      |           | Porsch            | Turnov           | Czech Republic       |
| Daniele      |           | Porru             | Pavia            | Italy                |
| Daniel       | Hodade    | Porav             | Cluj-Napoca      | Romania              |
| Roberto      |           | Ponchietti        | Siena            | Italy                |
| Giorgio      |           | Pomara            | Pisa             | Italy                |
| Konstantinos |           | Polyzois          | Manchester       | United Kingdom       |
| Hasan        | S.        | Pliev             | Domodedovo       | Russia               |
| Alexei       | Yurievich | Plekhanov         | Saint-Petersburg | Russia               |
| Pawel        |           | Plaza             | Lublin           | Poland               |
| Guido        |           | Platz             | Ruesselsheim     | Germany              |
| Mehmet       | Mesut     | Piskin            | Konya            | Turkey               |
| Germar       |           | Pinggera          | Innsbruck        | Austria              |
| Mohan        |           | Pillai            | Blackburn        | United Kingdom       |
| Dirk         |           | Piehler           | Greifswald       | Germany              |
|              |           |                   | San Donato       |                      |
| Stefano      |           | Picozzi           | Milanese         | Italy                |
| David        |           | Piccolotti        | Lagosanto (FE)   | Italy                |
| Juan         | Jose      | Picazo            | Madrid           | Spain                |
| Catherine    | Elizabeth | Philps Pereira    | Oslo             | Norway               |
| Joshua       | Tarun     | Phillips          | Birmingham       | United Kingdom       |
| Yuriy        | Yuryevich | Petrovskiy        | Odessa           | Ukraine              |
| Georgios     | Loizos    | Petrikkos         | Athens           | Greece               |
| John         |           | Peters            | London           | United Kingdom       |
| Melanie      |           | Peter             | Luebeck          | Germany              |
|              |           |                   |                  | Serbia and           |
| Tunãfâ«      | P         | Pervorfi          | Prishtina        | Montenegro           |
| Giacomo      |           | Perugia           | Rome             | Italy                |
| Dominik      | Georg     | Pernkopf          | Vienna           | Austria              |
| Tamara       | Sergeevna | Perepanova        | Moscow           | Russia               |
| Miguel       | Angel     | Peredo            | Mexico           | Mexico               |
| Dhelma       | Isabel    | Pellãfân          | Caracas          | Venezuela            |
| Miguel       | Angel     | Pedrola           | Venado Tuerto    | Argentina            |
| Rizky        |           | Paukstadt         | Hof              | Germany              |
| Antonio      | L         | Pastore           | Terracina (LT)   | Italy                |
| Sergii       | Petrovich | Pasiechnikov      | Kiev             | Ukraine              |
| Jai          | Pal       | Paryani           | Abu Dhabi        | United Arab Emirates |
| Pawel        |           | Parniewski        | Lodz             | Poland               |



|             |            |               |                  |                |
|-------------|------------|---------------|------------------|----------------|
| Shin        | Jae        | Park          | Daegu            | Korea, South   |
| Seung Chol  |            | Park          | Iksan            | Korea, South   |
| Christos    |            | Papandreou    | Arta             | Greece         |
| Anestis     | G.         | Papadopoulos  | Ptolemyda        | Greece         |
| Vlad        |            | Pantea        | Gelsenkirchen    | Germany        |
| Ioannis     |            | Panopoulos    | Athens           | Greece         |
| Manoj       | Kumar      | Panigrahi     | Berhampur        | India          |
| Shiv        | Kumar      | Pandian       | Colchester       | United Kingdom |
| Sanjay      |            | Pandey        | Mumbai           | India          |
| Juan        |            | Palou         | Barcelona        | Spain          |
| Ivan        | S.         | Palagin       | Smolensk         | Russia         |
| Andras      |            | PãfâjCzelt    | Budapest         | Hungary        |
| Hakan       |            | Ozveri        | Istanbul         | Turkey         |
| Ahmet       |            | Ozturk        | Konya            | Turkey         |
| Firas       |            | Ozoe          | Chambery         | France         |
| Hakan       |            | Ozkardes      | Ankara           | Turkey         |
|             |            |               | ISTANBUL         |                |
| Tayyar      | Alp        | OZKAN         | &Kocaeli         | Turkey         |
| Ilhan       |            | Ozgunes       | Eskisehir        | Turkey         |
| Muhammet    | Fuat       | Özcan         | Ankara           | Turkey         |
| Alexander   | Georgiev   | Otzetov       | Sofia            | Bulgaria       |
| Michael     |            | Osei-Tether   | Kumasi           | Ghana          |
| Alva        | Damaris    | Ortiz         | La Libertad      | El Salvador    |
| Mazhar      |            | Ortaãfâş      | Istanbul         | Turkey         |
| Samir       | Shaaban    | Orabi         | Alexandria       | Egypt          |
| Chong Chien |            | Ooi           | Selangor         | Malaysia       |
| Rahmi       |            | Onur          | Elazig           | Turkey         |
| Eng         | Kwee       | Ong           | Barnstaple       | United Kingdom |
| Daniel      |            | Oliveira-Reis | Porto            | Portugal       |
| Kagan       | Felixovich | Oleg          | St.Persburg      | Russia         |
| Peter       | Jochen     | Olbert        | Marburg          | Germany        |
| Taylan      |            | Oksay         | Isparta          | Turkey         |
| Athanassios |            | Oeconomou     | Larissa          | Greece         |
| Yusuf       | Vehbi      | Ocak          | Sanliurfa        | Turkey         |
| Gaga        |            | Nutsubidze    | Kutaisi          | Georgia        |
| Byron       | F          | Nunez Freile  | Quito            | Ecuador        |
| Dmitry      |            | Nitkin        | Minsk            | Belarus        |
| Abolghasem  |            | Nikfallah     | Tehran           | Iran           |
| Heinz       | Gerardo    | Nicolai       | Santiago         | Chile          |
| Dong        | Le         | Nguyen        | Ho Chi Minh City | Vietnam        |
| Roberto     | Rossi      | Neto          | Essen            | Germany        |
| Elie        | Ghannam    | Nemr          | Beirut           | Lebanon        |
| Hemant      | Bhanudas   | Nemade        | Basildon         | United Kingdom |
| Aleksei     |            | Nelovkov      | Tallinn          | Estonia        |
| Dana        | Gabriela   | Negru         | Arad             | Romania        |
| Oktay       |            | Nazli         | Izmir            | Turkey         |

|                  |                |                  |              |                |
|------------------|----------------|------------------|--------------|----------------|
| Stephen          |                | Nazareth         | Makati City  | Philippines    |
| Saygin           |                | Nayman Alpat     | Eskisehir    | Turkey         |
| Ala Eddin        | Daud           | Natsheh          | Jerusalem    | Israel         |
| Matteo           |                | Napoli           | Trapani      | Italy          |
| Lukacs           |                | Nandor           | Kecskemet    | Hungary        |
| Djordje          | Petar          | Nale             | Belgrade     | Seychelles     |
| Wataru           |                | Nakamura         | Tokyo        | Japan          |
| Haitham          | Saeed          | Nakad            | Alswaida     | Syria          |
| Ali              |                | Naghoni          | Tehran       | Iran           |
| Akaki            | A.N.           | Nadareishvili    | Tbilisi      | Georgia        |
| Samer            |                | Nabolsi          | Tulle        | France         |
| Ben Sorba        |                | Nabil            | Sousse       | Tunisia        |
| Kurt             | G              | Naber            | Straubing    | Germany        |
| Yong-Gil         |                | Na               | Daejeon      | Korea, South   |
| Dmytro           | Mykhailovich   | Mykhailov        | Kyiv         | Ukraine        |
| Nazim            | -              | Mutlu            | KOCAELI      | Turkey         |
| Necmettin        | Aydin          | Mungan           | Zonguldak    | Turkey         |
| Mehmet           | Ugur           | Mungan           | Izmir        | Turkey         |
| Ismaila          | A              | Mungadi          | Sokoto       | Nigeria        |
|                  |                | Mukhamed         |              |                |
| Bakhadirkhanov   | Mukhamed Zarif | Kabirkhonovich   | Tashkent     | Uzbekistan     |
| Volker           |                | Mueller-Mattheis | Duesseldorf  | Germany        |
| Kien             | Alfred         | Mteta            | Moshi        | Tanzania       |
| Noreddin         | Hamza          | Msessa           | Tripoli      | Libya          |
| Vladimir         |                | Mozetic          | Rijeka       | Croatia        |
| Javad            | Nafchi         | Moussavi         | Szolnok      | Hungary        |
| Youssef          |                | Moussa           | Aleppo       | Syria          |
| Seyed Habibollah |                | Mousavi-Bahar    | Hamadan      | Iran           |
| Emad Eldin       | Khalid         | Mousa            | Sohar        | Oman           |
| Renato           | Lains          | Mota             | LISBOA       | Portugal       |
| Giuseppe         |                | Mostaccio        | ESTE (PD)    | Italy          |
| Mohammad         | Kazem          | Moslemi          | Qom          | Iran           |
|                  |                |                  | Frankfurt Am |                |
| Saskia           | Carmen         | Morgenstern      | Main         | Germany        |
| Rayo             |                | Morfin           | Guadalajara  | Mexico         |
| Manuel           | F              | Montesino        | Eneriz       | Spain          |
| Myron            | Sidonio        | Monteiro         | Bangor       | United Kingdom |
| Nurbek           | Kytaibekovich  | Monolov          | Bishkek      | Kyrgyzstan     |
| Gabriella        |                | Mombelli         | Magenta      | Italy          |
| Mayad            | Nouma          | Moktash          | Najran       | Saudi Arabia   |
| Gholamreza       |                | Mokhtari         | Rasht        | Iran           |
| Tatyana          | Nikolaevna     | Moiseenko        | Novosibirsk  | Russia         |
| Radman           | Abdullah       | Mohammed         | Hodaidah     | Yemen          |
| Moudouni         | Said           | Mohammed         | Marrakech    | Morocco        |
| Aza              | A              | Mohammed         | Northampton  | United Kingdom |
| Ahmed            | Hedeia         | Mohamed          | Hurghada     | Egypt          |

|              |             |                 |                 |                |
|--------------|-------------|-----------------|-----------------|----------------|
| Mohammadreza |             | Moein           | Yazd            | Iran           |
| Muhammad     |             | Moazzam         | Derby           | United Kingdom |
| Lampros      | Petros      | Mitrakas        | Larissa         | Greece         |
| Warli        | Syah        | Mirsya          | Medan           | Indonesia      |
| Chen         |             | Ming            | Nanjing         | China          |
| Seung Ki     |             | Min             | Seoul           | Korea, South   |
| Stephan      | M           | Miller          | Gelsenkirchen   | Germany        |
| Jose         | Ignacio     | Militello       | Salta           | Argentina      |
| Karl         | Joensen     | Mikines         | Herlev          | Denmark        |
| Vartolomei   | M           | Mihai Dorin     | Ludus           | Romania        |
| Iilir        | Iljaz       | Miftari         | Pristina        | Albania        |
| Jean-Claude  |             | Miermont        | Nimes           | France         |
| Ramunas      |             | Mickevicius     | Kaunas          | Lithuania      |
| Uwe          | HG          | Michl           | Hamburg         | Germany        |
| Bernardino   |             | Miãfã±Ana Lopez | Murcia          | Spain          |
| Naoufel      |             | MIAADI          | Rennes          | France         |
| Christian    |             | Meyer           | Hamburg         | Germany        |
|              |             |                 | Moron. Ciego De |                |
| Denis        | Abel        | Mesa Borroto    | Avila           | Cuba           |
| Oguz         |             | Mertoglu        | Izmir           | Turkey         |
| Frank        |             | Mennigen        | Rheine          | Germany        |
|              |             |                 | Sant Pere De    |                |
| Violeta      |             | Menendez Lopez  | Ribes           | Spain          |
| Massimo      |             | Meneguolo       | Belluno         | Italy          |
|              |             |                 | Posadas,        |                |
| Gustavo      | Adolfo      | Mendez          | Misiones        | Argentina      |
| Badaruddin   | A           | Memon           | Khairpur        | Pakistan       |
| Michael      | Dimitrios   | Melekos         | Larissa         | Greece         |
| Andreas      |             | Meiãfã_Ner      | Bonn            | Germany        |
| Jose         |             | Medina-Polo     | Madrid          | Spain          |
| Jan          |             | Mecl            | Liberec         | Czech Republic |
| Javier       |             | Mayor De Castro | Madrid          | Spain          |
| Alexander    |             | Maykhir         | Nizhny Novgorod | Russia         |
| Ivan         | Victorovich | Matveyeu        | Vitebsk         | Belarus        |
| Deliu-Victor |             | Matei           | Milan           | Italy          |
|              |             |                 | Loma Hermosa.   |                |
|              |             |                 | Pcia De Buenos  |                |
| Maria        |             | Mastruzzo       | Aires           | Argentina      |
| Massimo      |             | Massarelli      | Ivrea           | Italy          |
|              |             |                 |                 | Serbia and     |
| Goran        | S           | Marusic         | Novi Sad        | Montenegro     |
| Dean         |             | Markiã          | Rijeka          | Croatia        |
| Chiara       |             | Mariani         | Pisa            | Italy          |
| Andreas      | E.A.        | Manseck         | Ingolstadt      | Germany        |
| Aditya       |             | Manjunath       | Bristol         | United Kingdom |
| Cristian     | Nicolae     | Manea           | Cluj Napoca     | Romania        |

|                    |            |                 |                  |                |
|--------------------|------------|-----------------|------------------|----------------|
| Amar               | Kumar      | Manandhar       | Varna            | Bulgaria       |
| Annika             |            | Malmquist       | Ystad            | Sweden         |
| Ercan              |            | Malkoc          | Istanbul         | Turkey         |
| Bartosz            | Radoslaw   | Malkiewicz      | Wroclaw          | Poland         |
| Anton              | I.         | Maliavin        | Ulyanovsk        | Russia         |
| Saidamin           | Anvarovich | Makhsudov       | Tashkent         | Uzbekistan     |
| Julia              |            | Makarycheva     | Samara           | Russia         |
|                    |            |                 | Rothenburg O. D. |                |
| Michael            |            | Maier           | Tauber           | Germany        |
| Mahmoud            | Farouk     | Mahmoud Awad    | Zagazig,Sharqia  | Egypt          |
| Benatta            |            | Mahmoud         | Oran             | Algeria        |
| Pattabiraman       |            | Maheshkumar     | Kings Lynn       | United Kingdom |
| Ida                | Soo-Fan    | MAH             | Hong Kong        | Hong Kong      |
| Vittorio-Gianpaolo |            | Magri-Perletti  | Milano           | Italy          |
| Giuseppe           |            | Magistro        | Olching          | Germany        |
| Massimo            | -          | Maffezzini      | Genova           | Italy          |
| Rafael             | Velazquez  | Macias          | Mexico           | Mexico         |
| Ciaran             | B          | Lynch           | Birmingham       | United Kingdom |
| Oliver             |            | Luzar           | Bonn             | Germany        |
|                    |            |                 | Vitry Le         |                |
| Nicolae            |            | LUPSASCA        | Franãfã\$Ois     | France         |
| Jens-Claudio       |            | Lunz            | Regensburg       | Germany        |
| Martin             |            | Ludwig          | Marburg          | Germany        |
| Qiao               |            | Ludong          | Beijing          | China          |
| Shing-Hwa          |            | Lu              | Taipei City      | Taiwan         |
| Kevin              |            | Lu              | Kaohsiung        | Taiwan         |
| Mikhail            | *          | Lozinskiy       | Trnava           | Slovakia       |
| Andrea             |            | Loreto          | Roma             | Italy          |
|                    |            |                 | Miranda De Ebro  |                |
| Miguel             | Angel      | Lopez-Aramburu  | (Burgos)         | Spain          |
|                    |            |                 | Don Benito,      |                |
| Andres             |            | Lopez De Alda   | Badajoz          | Spain          |
| Pedro              |            | Lopez Cubillana | Murcia           | Spain          |
| Sofia              | Pinheiro   | Lopes           | Loures           | Portugal       |
| Sudhir             | Kumar      | Lokwani         | Bhopal,M.P.      | India          |
| Joyce              |            | Loeffler        | Nice             | France         |
| Branimir           |            | Lodeta          | Varazdin         | Croatia        |
| Michele            |            | Lodde           | Bolzano          | Italy          |
| Umberto            |            | Locunto         | Firenze          | Italy          |
| Chiwen             |            | Lo              | New Taipei City  | Taiwan         |
| Eva                |            | Ljunggren       | Lund             | Sweden         |
| Bosas              |            | Liudas          | Kaunas           | Lithuania      |
| Anna               | AL         | Liskova         | Nitra            | Slovakia       |
| Gabriele           |            | Lindenau        | Vienna           | Austria        |
| Teng Lung          |            | Lin             | Taipei           | Taiwan         |
| Donghoon           |            | Lim             | Gwangju          | Korea, South   |

|             |              |                |                  |                |
|-------------|--------------|----------------|------------------|----------------|
| Di          | Pi           | Li             | Nasice           | Croatia        |
| Gabriel     | Isaac        | Levy Hara      | Buenos Aires     | Argentina      |
| Fredrik     |              | Levin          | Stockholm        | Sweden         |
| Philippe    |              | Lesprit        | Crãfã©Teil       | France         |
| Peter       | Hasan        | Leonidovich    | Moscow           | Russia         |
| Dr. Mohamed | Said         | Leithy         | Alexandria       | Egypt          |
| Jãfã¶Rg     |              | Leifeld        | Leer             | Germany        |
| Michael     | Yu           | Leh            | Pasig            | Philippines    |
| Seung-Ju    |              | Lee            | Suwon            | Korea, South   |
| Sang Don    |              | Lee            | Yansan           | Korea, South   |
| Hyun-Rim    |              | Lee            | Buchon-Si        | Korea, South   |
|             |              |                | Harrogate, North |                |
| Elaine      | Wei Yin      | Lee            | Yorkshire        | United Kingdom |
| Chang-Ho    |              | Lee            | Cheonan          | Korea, South   |
| Angus       |              | Lecuona        | Cape Town        | South Africa   |
|             |              |                |                  | Serbia and     |
| Aleksandar  |              | Lazic          | Belgrade         | Montenegro     |
| Jan         | Henrik       | Laurick        | Hagen            | Germany        |
| Stefano     |              | Lauretti       | Roma             | Italy          |
| Firstname   | Middlename   | Lastname       | City             | Country        |
| Roland      |              | Lang           | Landshut         | Germany        |
| Daniel      |              | Landau         | Beer Sheva       | Israel         |
| Michael     |              | Lamche         | Vienna           | Austria        |
| Akos        |              | Lakatos        | Szentes          | Hungary        |
| Muhammad    | Shahzad      | Laghari        | Scunthorpe       | United Kingdom |
| Marãfã©     | Josãfã©      | Lãfã³Pez Furst | Buenos Aires     | Argentina      |
| Vanda       | Daniela      | Lãfã³Pez       | Caracas          | Venezuela      |
| Hanga       |              | Laszlo Miklos  | Papa             | Hungary        |
| Pasquale    | Gianfranco   | La Rosa        | Giarre (CT)      | Italy          |
| Christian   |              | La Hmann       | Ulm              | Germany        |
| Espen       |              | Kvan           | Drammen          | Norway         |
|             |              |                |                  | Macedonia, The |
| Marjan      | Jovan        | Kuzmanoski     | Skopje           | Republic of    |
| Dimitri     |              | Kuzenko        | Uelzen           | Germany        |
| Ainura      | Zarylbekovna | Kutmanova      | Bishkek          | Kyrgyzstan     |
| Fatih       | Osman        | Kurtulus       | Istanbul         | Turkey         |
| Marcin      |              | Kurant         | Bydgoszcz        | Poland         |
| Shlomo      | Mario        | Kuntze         | Richterswil      | Switzerland    |
| Hiromi      |              | Kumon          | Okayama          | Japan          |
| Ekaterina   | V.           | Kulchavenya    | Novosibirsk      | Russia         |
| Alexander   |              | Kugler         | Marktredwitz     | Germany        |
| Shoji       |              | Kudou          | Chuo Yamanahsi   | Japan          |
| Aleksandra  |              | Krznar         | Celje            | Slovenia       |
| Alexander   | Nikolaevich  | Kruglov        | Moskow           | Russia         |
| Fabian      |              | Kronschnabl    | Landshut         | Germany        |

|           |                |                   |                  |                |
|-----------|----------------|-------------------|------------------|----------------|
| Christian |                | Kriegel           | Leipzig          | Germany        |
| Benedikt  |                | Kreiner           | Berlin           | Germany        |
| W.        |                | Kramer            | Bad Soden        | Germany        |
| Nicole    | Petra          | Kraischits        | Vienna           | Austria        |
| Margus    |                | Krabi             | Tallinn          | Estonia        |
| Tamas     | Bognar         | Kozma             | Zalaegerszeg     | Hungary        |
| Zafer     |                | Kozacioglu        | Izmir            | Turkey         |
| Peter     |                | Kovács            | Eger             | Hungary        |
| Grigorios |                | Kousidis          | ATHENS           | Greece         |
| Sotirios  | Athanasios     | Koukos            | Ioannina         | Greece         |
| Rumen     | Pachev         | Kotsev            | Pleven           | Bulgaria       |
| Serghiy   | Mykolayovich   | Kotsar            | Mukachevo        | Ukraine        |
| Sergey    | Vladislavovich | Kotov             | Moscow           | Russia         |
| Shigeru   |                | Kosugi            | Tokyo            | Japan          |
| Alexander | Yrevich        | KOROLEV           | Saratov          | Russia         |
| Laszlo    |                | Koranyi           | Sopron           | Hungary        |
| Károly    |                | Könvyes           | Szombathely      | Hungary        |
| Angelis   |                | Konstantinopoulos | Patras           | Greece         |
|           |                |                   |                  | Serbia and     |
| Tome      | Nik            | Komani            | Gjakova-Kosova   | Montenegro     |
| Sanjay    |                | Kolte             | Nagpur           | India          |
| Ivan      |                | Kolombo           | Turnov           | Czech Republic |
| Nikolay   |                | Kolev             | Pleven           | Bulgaria       |
| Dirk      |                | Koglin            | Ulm              | Germany        |
| Mikhail   | Josefovich     | Kogan             | Rostov On Don    | Russia         |
| Lukas     |                | Kocis             | Poprad           | Slovakia       |
| Ramazan   |                | Kocaaslan         | Istanbul         | Turkey         |
| Roberto   |                | Knez              | Trieste          | Italy          |
| Jacques   |                | Klein             | Geneva           | Switzerland    |
| Hiroshi   |                | Kiyota            | Tokyo            | Japan          |
| Stiliana  |                | Kiurkchieva       | Sofia            | Bulgaria       |
| Attila    |                | Kiss              | Budapest         | Hungary        |
| Jacek     |                | Kis               | Krasnystaw       | Poland         |
| Sinan     |                | Kirecci           | Istanbul         | Turkey         |
| Pernille  | Skjold         | Kingo             | Aarhus N         | Denmark        |
| Quinten   | Michael        | King              | Palmerston North | New Zealand    |
| Th        |                | Kim               | Seoul            | Korea, South   |
| Kiho      |                | Kim               | Gyeongju         | Korea, South   |
| Kang Sup  |                | Kim               | Seoul            | Korea, South   |
| Jung Hoon |                | Kim               | Seoul            | Korea, South   |
| Jun-Mo    |                | Kim               | Bucheon          | Korea, South   |
| Jong Il   |                | Kim               | Busan            | Korea, South   |
| Hong Bin  |                | Kim               | Seongnam         | Korea, South   |
| Chul Sung |                | Kim               | Korea            | Korea, South   |
| Mehmet    |                | KILINC            | Konya            | Turkey         |
| Margot    | Martyna        | Kieruj            | Bergisch         | Germany        |

|            |            |                  |                |                  |
|------------|------------|------------------|----------------|------------------|
|            |            |                  | Gladbach       |                  |
| Iradj      |            | Khosropanah      | Rasht          | Iran             |
| Dinyar     |            | Khazaeli         | Ahvaz          | Iran             |
| Mhd        | Mouayed    | Khawajki         | Damascus       | Syria            |
| Priya      |            | Khanna           | London         | United Kingdom   |
| Taskeen    | Ahmad      | Khan             | Peshawar, NWFP | Pakistan         |
| Shahid     | Aziz Anwer | Khan             | Redhill        | United Kingdom   |
| Farrukh    | Kamal      | Khan             | Canterbury     | United Kingdom   |
|            |            |                  | Newcastle Upon |                  |
| Faisal     | Rauf       | Khan             | Tyne           | United Kingdom   |
| Rinat      |            | Khammatov        | Togliatti      | Russia           |
| Ismail     | Mohamed    | KHALAF           | Cairo          | Egypt            |
| Karthi     |            | Keyan            | Cochin         | India            |
| Mehmet     | Selcuk     | Keskin           | Ankara         | Turkey           |
| Gabor      |            | Kerenyi          | Eger           | Hungary          |
| Eray       |            | Kemahli          | Istanbul       | Turkey           |
| Nuri       |            | Keimeroã,,Å, Lu  | Bilecik        | Turkey           |
| Bastian    |            | Keck             | Erlangen       | Germany          |
| Fahimeh    | -          | Kazemi Rashed    | Tabriz         | Iran             |
| Cevdet     |            | Kaya             | Istanbul       | Turkey           |
| Albert     |            | Kaufmann         | Cologne        | Germany          |
| Matthias   |            | Katzmann         | Bad Nauheim    | Germany          |
| Adham      | Mohamad    | Kassem           | Beiruth        | Lebanon          |
| Simon      |            | Kasa             | Majuro         | Marshall Islands |
| Kamila     |            | Karmasova        | Brno           | Czech Republic   |
| Ferhi      |            | Karim            | Rennes         | France           |
| Roman      | Titus      | Karig            | Neuss          | Germany          |
| Neven      |            | Kapun            | Zagreb         | Croatia          |
| Rajni      |            | Kapoor           | Lucknow        | India            |
| Mohammad   | Anas       | Kanout           | Coburg         | Germany          |
| Jacob      |            | Kaneti           | Beer-Sheva     | Israel           |
| Ktari      | Ktari      | Kamel            | Monastir       | Tunisia          |
| Ahmed      | Ismail     | Kamel            | Giza           | Egypt            |
| Odunayo    |            | Kalejaiye        | Plymouth       | United Kingdom   |
| Panagiotis |            | Kalafatis        | Rhodos         | Greece           |
| Bela       |            | Koves            | Budapest       | Hungary          |
| Hikmet     |            | Kãfã¶Seoã,,Å, Lu | IZMIR          | Turkey           |
| Mustafa    |            | Kadihasanoglu    | Istanbul       | Turkey           |
| Alina      | No Name    | Kaczmarek        | Jozefoslaw     | Poland           |
| Brahim     | Brahim     | Kacem            | Mostaganem     | Algeria          |
| Jan        |            | Kaan             | Utrecht        | Netherlands      |
| Suleyman   |            | Karaca           | Malatya        | Turkey           |
| Rozalia    |            | Juraszik         | Budapest       | Hungary          |
| Seung Il   |            | Jung             | Hwasun         | Korea, South     |
| Peter      |            | Jung             | Ellwangen      | Germany          |
| Noor       | Nabi       | Junejo           | Karachi        | Pakistan         |

|                     |                        |                           |                                 |                               |
|---------------------|------------------------|---------------------------|---------------------------------|-------------------------------|
| Robert Kondas       |                        | Juhasz Jozsef             | Berettyoujfaludapest            | Hungary Hungary               |
| Teemu Rafe          | Juhani M.              | Joutsu Joseph             | Pori leper                      | Finland Belgium               |
| Bruno John          | Alexandre Guerra Jared | Jorge Pereira Johnson Jim | Covilhã Madrid                  | Portugal Spain                |
| Antonio Ho          |                        | Pacheco Jeon              | Granada Daegu                   | Spain Korea, South            |
| Susanne Ursula      | Jong Skou              | Jensen Janzen             | Aarhus N Hannover Nove Mesto Na | Denmark Germany               |
| Jiri Vã             |                        | Janu Janda                | Morave Plzeã                    | Czech Republic Czech Republic |
| Basharat Lotte      | - Kaasgaard            | Jameel Jakobsen           | Aberystwyth Aarhus              | United Kingdom Denmark        |
| Ramasamy Syed       | Qasim                  | Jaganathan Jaffry         | Solihull Galway                 | United Kingdom Ireland        |
| Alessandro Urii     |                        | Izzo Ivanov               | Napoli Ekateringburg            | Italy Russia                  |
| George Dmitri       | Valerievich D          | Ivanov Ivanov             | Minsk Kiev                      | Belarus Ukraine               |
| Untila Rakasz       | Victor                 | Iurie Istvan              | Chisinev Kaposvã                | Moldova Hungary               |
| Vass Jamoliddin     | Abdullajanov           | Istvã Isroilovich         | Miskolc Namangan                | Hungary Uzbekistan            |
| Mohamed Noritaka    |                        | Ismail Ishito             | Bristol Kurashiki               | United Kingdom Japan          |
| Satoshi Ekaterina   | Martjushova            | Ishihara Irgens           | Minokamo, Gifu Tromsã           | Japan Norway                  |
| Jacques Beniamino   |                        | Irani Iorio               | Poitiers Roma                   | France Italy                  |
| Hisato Hodi         |                        | Inatomi Imre              | Fukutsu Szolnok                 | Japan Hungary                 |
| Ben Salah Anthony   | Chika                  | Imed Igbokwe              | Bizerte Lagos                   | Tunisia Nigeria               |
| Alaa Akhtar Hussain | Ahmed                  | Hussein Hussain           | Cairo Slough                    | Egypt United Kingdom          |
| Emre Tobias         |                        | Huri Huebschle            | Ankara Freiburg                 | Turkey Germany                |
| Xiaoming Andras     |                        | Huang Hoznek              | Shenyang Creteil                | China France                  |
| Mustafa Burak Titia |                        | Hoşcan Hopmans            | Alanya-Antalya Utrecht          | Turkey Netherlands            |
| Adel                | EM Abdulkader          | Hommos                    | Maadi, Cairo                    | Egypt                         |



|              |              |                 |                  |                        |
|--------------|--------------|-----------------|------------------|------------------------|
| Petr         |              | Holy            | Praha            | Czech Republic         |
| Sten         |              | Holmång         | Goteborg         | Sweden                 |
| Endre        |              | Holman          | Kiskunhalas      | Hungary                |
| Reinhard     | Hans Hermann | Hofmann         | Wolfsburg        | Germany                |
|              |              |                 |                  | Bosnia and Herzegovina |
| Harun        |              | Hodzic          | Zenica           | Herzegovina            |
| Andreas      |              | Hinkel          | Herne            | Germany                |
| Alexander    | Ivanov       | Hinev           | Varna            | Bulgaria               |
| Mustafa      |              | Hilmy           | Stirling         | United Kingdom         |
| Vital        |              | Hevia           | Madrid           | Spain                  |
| Jorge        |              | Hernandez       | Panama           | Panama                 |
| Javier       | Alejandro    | Hernandez       | Barquisimeto     | Venezuela              |
|              |              |                 | Santa Cruz De    |                        |
| David        |              | Hernanadez      | Tenerife         | Spain                  |
| Jiri         |              | Heracek         | Prague           | Czech Republic         |
| Derek        | B            | Hennessey       | Derry            | United Kingdom         |
| Flavio       | L            | Heldwein        | Florianãfâ³Polis | Brazil                 |
| Burkhard     | Johannes     | Held            | Berlin           | Germany                |
| Mohamed Hani | Abdulwahab   | Helal           | Jeddah           | Saudi Arabia           |
| Ortwin       |              | Heiãfã_Ler      | Gansersdorf      | Austria                |
| Hiroshi      |              | Hayami          | Kagoshima        | Japan                  |
| Simon        | John         | Hawkyard        | Scarborough      | United Kingdom         |
| Botan        |              | Hawas           | Vasteras         | Sweden                 |
| Gergely      |              | Hausmann        | Budapest         | Hungary                |
| Dinko        |              | Hauptman        | Zagreb           | Croatia                |
|              |              |                 | Pefka            |                        |
| Konstantinos |              | Hatzimouratidis | Thessaloniki     | Greece                 |
| Ismail       | M            | Hassan          | Dubai            | United Arab Emirates   |
| Hashim       |              | Hashim          | London           | United Kingdom         |
| Waleed       | Ali          | Hasan           | Manama           | Bahrain                |
| Sergio       | Pedro        | Haro            | Tromsoe          | Norway                 |
| Ivan         | lovev        | Handjiev        | Varna            | Bulgaria               |
| Vishwanath   | S            | Hanchanale      | York             | United Kingdom         |
| Chang        | Hee          | Han             | Uijeongbu        | Korea, South           |
| Arman        | H.           | Hambaryan       | Echmiadzin       | Armenia                |
| Ryoichi      |              | Hamasuna        | Kitakyushu       | Japan                  |
| Ramin        | --           | Hakimzadeh      | Ormiyeh          | Iran                   |
| Lars         |              | Haggarth        | Stockholm        | Sweden                 |
| Susanne      |              | Hagel           | Berlin           | Germany                |
| Marios       |              | Hadjipavlou     | London           | United Kingdom         |
| Nassya       | S.           | Hadjieva        | Sofia            | Bulgaria               |
| Perviz       |              | Haciyev         | Ankara           | Turkey                 |
| Mohamad      | Alsayed      | Habous          | Jedda            | Saudi Arabia           |
| U            | Sin          | Ha              | Seoul            | Korea, South           |
| Prem         | Raj          | Gyawali         | Kathmandu        | Nepal                  |
| Laszlo       |              | Gyanyi          | Budapest         | Hungary                |

|              |               |                  |                |                |
|--------------|---------------|------------------|----------------|----------------|
| Antonio      |               | Gutierrez        | L`Hospitalet   | Spain          |
| Necati       |               | Gürbüz           | Istanbul       | Turkey         |
| Cenk         |               | Gurbuz           | Istanbul       | Turkey         |
| Alfons       |               | Gunnemann        | Detmold        | Germany        |
| Adnan        |               | Gündoğdu         | İzmir          | Turkey         |
| Tawiz        | Gul           | Gul              | Doha           | Qatar          |
| Serigne      | Magueye       | Gueye            | Dakar          | Senegal        |
| Borut        |               | Gubina           | Ljubljana      | Slovenia       |
| Angelo       |               | Guarriello       | Andria         | Italy          |
| JesâfâS      | Guajardo      | Guajardo         | Lleida         | Spain          |
| Gevorg       | V.            | Grigoryan        | Yerevan        | Armenia        |
| Daniel       |               | Grell            | Berlin         | Germany        |
| Mireille     |               | Gregoire         | Quebec         | Canada         |
| Francesco    |               | Greco            | Halle Saale    | Germany        |
| H.J.         |               | Graff            | Solingen       | Germany        |
| Arthur       |               | Grabsky          | Yerevan        | Armenia        |
| Beata        |               | Grabowska        | Orebro         | Sweden         |
| Magnus       | J             | Grabe            | Malmo          | Sweden         |
| Hesham       | Saad          | Gouda            | Alexandria     | Egypt          |
| Eduardo      |               | Gotuzzo          | Lima           | Peru           |
| Dmitriy      | Gennadievich  | Goryainov        | Donetsk        | Ukraine        |
| Sadik        |               | Gorur            | Antakya/Hatay  | Turkey         |
| Maximilien   |               | Goris Gbenou     | Valence        | France         |
| Mehmet Resit |               | Goren            | Ankara         | Turkey         |
| Ravisankar   |               | Gopakumarapillai | Manama         | Bahrain        |
| Juan         | Uria          | Gonzalez-Tova    | Vic            | Spain          |
| Raquel       |               | Gonzalez-Lopez   | Madrid         | Spain          |
| Sergio       | Norbert       | Gonzalez-Bittner | Frankfurt      | Germany        |
| Francisco    |               | Gomez Veiga      | A Coruna       | Spain          |
| Yunus        | Emre          | Göger            | Konya          | Turkey         |
| Marcelo      | Alvear        | Godoy            | Santiago       | Chile          |
| Alexander    | Johannes      | Glowik           | Hannover       | Germany        |
| Bartek       |               | Gliniewicz       | Szczecin       | Poland         |
| Sidney       |               | Glina            | Sao Paulo      | Brazil         |
| Jochen       |               | Gleissner        | Wuppertal      | Germany        |
| Dimitrios    |               | Glaritis         | Heraklio       | Greece         |
| Canepa       |               | Giorgio          | Genoa          | Italy          |
| Fernando     | J.            | Giordano         | Merida         | Venezuela      |
| Thomas       |               | Gilbert          | Koblenz        | Germany        |
| Achilles     |               | Gikas            | Heraklion      | Greece         |
| Vladimir     |               | Giblo            | Hradec Kralove | Czech Republic |
| Claudio      | Antonio       | Giberti          | Chiavari       | Italy          |
| Artur        |               | Gibas            | Gdansk         | Poland         |
| Assem        | Sayed-Ahmed   | Ghallab          | Tanta          | Egypt          |
| Sobhan       |               | Ghafouryan       | Ilam           | Iran           |
| Ardalan      | Abdolghafouri | Ghafouri         | Doha           | Qatar          |

|                |                   |                      |                |                |
|----------------|-------------------|----------------------|----------------|----------------|
| Ulrich         |                   | Gertenbach           | Hagen          | Germany        |
| Lara           |                   | Gerbrandy-Schreuders | Amsterdam      | Netherlands    |
| Ventsislav     | Dinkov            | Georgiev             | Ruse           | Bulgaria       |
| Georgios       |                   | Georgiadis           | Redhill        | United Kingdom |
| Andrey         | Alexandravich     | Gavrusev             | Minsk          | Belarus        |
| Teresita       | Tanaglin          | Gaviola              | Makati         | Philippines    |
| Sandro         | Silva             | Gaspar               | Lisboa         | Portugal       |
| Ioannis        | Dimitrios         | Garifallos           | Samos          | Greece         |
| Vanessa        |                   | Gardikou             | Pireas         | Greece         |
| Francisco      | Antonio           | Garcia Velandria     | Valencia       | Venezuela      |
| Antonio        | SăfâjNchez        | Garcăfâa             | Linares        | Spain          |
| Maria          |                   | Garabasova           | Trnava         | Slovakia       |
| Thirumalai     |                   | Ganesan              | Chennai        | India          |
| Carlos         |                   | Gamiăfâ±O            | DF             | Mexico         |
| Catarina       | Diogo             | Gameiro              | Lisboa         | Portugal       |
| Roman          | Vladislavovich    | Gamazkov             | St-Petersburg  | Russia         |
| Xavier         |                   | Gamăfâ©              | Toulouse       | France         |
| David          | J                 | Galvin               | Dublin         | Ireland        |
| Michele        |                   | Gallucci             | Rome           | Italy          |
| Natalya        | Gennagievna       | Galkina              | Penza          | Russia         |
| Carlos         | Pacheco           | Gahbler              | Mexico, D.F.   | Mexico         |
| Juan           |                   | Găfă³Mez Rivas       | Madrid         | Spain          |
| Sandor         |                   | Gecs                 | Veszprem       | Hungary        |
| Begench        | Gurbangeldiyevich | Gadamov              | Ashgabat       | Turkmenistan   |
| Dr Khaled      | Abdul Moneim      | Gadalla              | Cairo          | Egypt          |
| Mauro          |                   | Gacci                | Florence       | Italy          |
| Yaowen         |                   | Fu                   | Changchun      | China          |
| Hans-Martin    |                   | Fritsche             | Regensburg     | Germany        |
| Cristina       | Cristina          | Freuler              | Buenos Aires   | Argentina      |
| Olga           |                   | Fraschini            | Lecco          | Italy          |
| Michail        |                   | Frank                | Ekaterinburg   | Russia         |
| Duval          |                   | Francois             | Reims          | France         |
| Gianfranco     |                   | Formicola            | Napoli         | Italy          |
| Eleftherios    | D                 | Fokaefs              | Patras         | Greece         |
| Zoltăn         |                   | Florian              | Nagykanizsa    | Hungary        |
| Christian      |                   | Fisang               | Bonn           | Germany        |
| Juliane        |                   | Fiebich              | Burgwedel      | Germany        |
| Mariaconsiglia |                   | Ferriero             | Rome           | Italy          |
| Vavassori      | Ivano             | Ferdinando           | Bergamo        | Italy          |
| Pal            |                   | Fel                  | Dombovar       | Hungary        |
| Michal         |                   | Fedorko              | Brno           | Czech Republic |
| Gaiseniuk      | Z                 | Fedir                | Kiev           | Ukraine        |
| Narcisi        |                   | Federico             | Tordino Teramo | Italy          |
| Zsolt          |                   | Fazakas              | Budapest       | Hungary        |

|            |             |                |                  |                      |
|------------|-------------|----------------|------------------|----------------------|
| Antal      | -           | Farkas         | Debrecen         | Hungary              |
| Rui        | Almeida     | Farinha        | Lisbon           | Portugal             |
| Yasser     | Abd Elraouf | Farahat        | Dubai            | United Arab Emirates |
| Bernhard   |             | Fangmeyer      | Lingen           | Germany              |
| Walid      |             | FALOU          | Beirut           | Lebanon              |
| Siavash    |             | Falahatkar     | Rasht            | Iran                 |
| Christian  | Christian   | Fahr           | Reutlingen       | Germany              |
| Amogu      | Kalu        | Eziyi          | Osogbo           | Nigeria              |
| Bakurov    | E           | Evgeny         | Rostov-On-Don    | Russia               |
|            |             |                | Saint Aubin Sur  |                      |
| Fleury     |             | Estelle        | Scie             | France               |
| Iouri      | M           | Essilevski     | Moscow           | Russia               |
| Khadigeh   |             | Esmaeili       | Ilam             | Iran                 |
| Erkan      |             | Erkan          | Istanbul         | Turkey               |
| Erbil      |             | Ergenekon      | Istanbul         | Turkey               |
| Seydali    |             | Eredjepov      | Ferghana         | Uzbekistan           |
| Erhan      | -           | Erdogan        | Karaman          | Turkey               |
| Ibrahim    |             | Erayman        | Konya            | Turkey               |
| Carmen     |             | Enguita        | Madrid           | Spain                |
| Christina  | Luise       | Engels         | Karlsruhe        | Germany              |
|            |             | Elstermann Von |                  |                      |
| Marcus     |             | Elster         | Berlin           | Germany              |
|            | Rashad      |                |                  |                      |
| Emad       | Mohamed     | Elsobky        | Abu Dhabi        | United Arab Emirates |
| Alaa       | Ali         | Elshennawy     | Cairo            | Egypt                |
|            | Ahmed       |                |                  |                      |
| Medhat     | Mohamed     | Elsayed        | Abu Dhabi        | United Arab Emirates |
| Maria      | Carlsen     | Elkjåfå R      | Aarhus           | Denmark              |
| Rehab      | Hosny       | El-Sokkary     | Zagazig          | Egypt                |
| Claus      |             | Eisenreich     | Bad Tolz         | Germany              |
| Solymossy  |             | Egon           | Székesfehérvár   | Hungary              |
| Christian  |             | Eggersmann     | Rheine           | Germany              |
| Ioannis    | Panagiotis  | Efthimiou      | Chania           | Greece               |
| David      |             | Ebralidze      | Tbilisi          | Georgia              |
| Konstantin | Antonovich  | Dunets         | Saint-Petersburg | Russia               |
| Athanasius | Daud        | Dube           | Harare           | Zimbabwe             |
| Kim        | Maksut      | Drasa          | Tirana           | Albania              |
| Elisaveta  | Asenova     | Draghijeva     | Kuwait           | Kuwait               |
| Tomasz     |             | Drabarek       | Gdansk           | Poland               |
| Elif       |             | Doyuk Kartal   | Eskisehir        | Turkey               |
| Roland     |             | Donat          | Edinburgh        | United Kingdom       |
| Andreas    | Peter       | Dominik        | Giessen          | Germany              |
| Alexey     | Alexeevitch | Dolgiy         | Saint-Petersburg | Russia               |
| Razvan     | Vasile      | Dican          | Hof              | Germany              |
| Diab       | El-Sayed    | Diab           | Zagazig          | Egypt                |
| Manuel     |             | Di Biase       | Perugia          | Italy                |

|            |           |                  |                  |                |
|------------|-----------|------------------|------------------|----------------|
| Laura      | Frances   | Derbyshire       | Salford          | United Kingdom |
| Nese       |           | Demirturk        | Afyon            | Turkey         |
| Erhan      |           | Demirelli        | Giresun          | Turkey         |
| Umut       |           | Delibas          | Istanbul         | Turkey         |
| Giulio     |           | Del Popolo       | Firenze          | Italy          |
|            |           |                  |                  | Serbia and     |
| Kojic      | Dusan     | Dejan            | Belgrade         | Montenegro     |
| Liana      | Monica    | Deac             | Cluj-Napoca      | Romania        |
| Geert      |           | De Naeyer        | Aalst            | Belgium        |
| Jose       | Carneiro  | De Moura         | Lisbon           | Portugal       |
|            |           |                  | Grottaferrata    |                |
| Ferdinando |           | De Marco         | (Rome)           | Italy          |
| Siviardo   | Cristobal | De Leon          | Zapopan Jalisco  | Mexico         |
| Gaetano    |           | De Grande        | Siracusa         | Italy          |
| Gioacchino |           | De Giorgi        | Udine            | Italy          |
| Domenico   |           | De Carolis       | Ascoli P         | Italy          |
|            |           |                  | Newcastle Upon   |                |
| Mark       |           | Davis            | Tyne             | United Kingdom |
|            |           |                  | Newcastle Upon   |                |
| John       | Brinley   | Davies           | Tyne             | United Kingdom |
| Anton      |           | Dashko           | Moscow           | Russia         |
| Amitabh    |           | Dash             | Delhi            | India          |
| Debi       | Narayan   | Das Chaudhury    | PERTH            | United Kingdom |
| Fontana    |           | Dario            | Torino           | Italy          |
| Ziad       |           | Daoud            | Tripoli          | Lebanon        |
| Quang Oanh |           | Dao              | Hochiminh        | Vietnam        |
| Michael    |           | Dan              | Holon            | Israel         |
| Le Dinh    |           | Dam              | Les Abymes       | Guadeloupe     |
| Izak       |           | Dalva            | Ankara           | Turkey         |
| Hani       | R         | Dahmash          | Der Ezore        | Syria          |
| Hugo       | Alberto   | DãfãjVila        | Caracas          | Venezuela      |
| Xhevdet    | M.        | Cuni             | Prishtina        | Albania        |
|            |           |                  |                  | Serbia and     |
| Bogdan     | A.        | Culibrk          | Subotica         | Montenegro     |
| Jose       | Angel     | Cuesta-Alcalãfãj | Tudela (Navarra) | Spain          |
| Judit      |           | Csorba           | Debrecen         | Hungary        |
| Cristiano  |           | Cristini         | Rome             | Italy          |
| Pietro     |           | Cozzupoli        | Reggio Calabria  | Italy          |
| Pedro      |           | Coteron          | Murcia           | Spain          |
| Elisabetta |           | Costantini       | Perugia          | Italy          |
| Bogdan     |           | Costache         | ARAD             | Romania        |
| Tiago      | Pinto     | Correia          | Matosinhos       | Portugal       |
| Nick       |           | Cooley           | London           | United Kingdom |
| Sophie     |           | Conquy           | Paris            | France         |
| Nicholas   |           | Cohen            | Aberdeen         | United Kingdom |
| Manuel     | Ferreira  | Coelho           | Amadora          | Portugal       |

|            |         |                 |                                 |                          |
|------------|---------|-----------------|---------------------------------|--------------------------|
| Andrea     |         | Cocci           | Firenze                         | Italy                    |
| Liliana    | Ofelia  | Clara           | Buenos Aires                    | Argentina                |
| Matteo     | R.      | Ciuffreda       | Parma                           | Italy                    |
| Sinharib   |         | Citgez          | Istanbul                        | Turkey                   |
| Ettore     |         | Cirillo Marucco | Andria                          | Italy                    |
| Janusz     | Andrzej | Ciechan         | Lublin                          | Poland                   |
| Izzet      |         | Cicekbilek      | Zonguldak                       | Turkey                   |
| Jae Min    |         | Chung           | Busan                           | Korea, South             |
| Hong       |         | Chung           | Chungju                         | Korea, South             |
| Susanne    |         | Christmann      | Ludwigshafen                    | Germany                  |
| Michael    |         | Chrisofos       | Athens                          | Greece                   |
| Liaqat     |         | Chowoo          | Scunthorpe                      | United Kingdom           |
| Kostas     | Nik     | Chondros        | Heraklion                       | Greece                   |
| Jin-Bong   | .       | Choi            | Gyeonggi-Do                     | Korea, South             |
| Hyun-Sop   |         | Choe            | Suwon                           | Korea, South             |
| Yong-Hyun  |         | Cho             | Seoul                           | Korea, South             |
| Wonyeol    |         | Cho             | Busan                           | Korea, South             |
| Kang Jun   |         | Cho             | Bucheon-City<br>Koyang/Gyunggid | Korea, South             |
| In-Rae     |         | Cho             | o                               | Korea, South             |
| Archil     |         | Chkhotua        | Tbilisi                         | Georgia                  |
| Daniel     | Mihai   | Chirita         | Piatra Neamt                    | Romania                  |
| Edmund     |         | Chiong          | Singapore                       | Singapore                |
| Xi         |         | Cheng           | Taunton                         | United Kingdom           |
| Yee-Chun   |         | Chen            | Taipei                          | Taiwan                   |
| Ming       |         | Chen            | Nanjing                         | China                    |
| Christophe |         | Chemaslãfâ€     | Palmerston North                | New Zealand              |
| Stavros    | N       | Charalambous    | THESSALONIKI                    | Greece                   |
| Sammy      | K K     | Chan            | Hong Kong                       | Hong Kong                |
| Suchart    |         | Chaimuangraj    | Bangkok                         | Thailand                 |
| Mehmet     |         | Cetinkaya       | Istanbul                        | Turkey                   |
| Mete       |         | Çek             | Edirne                          | Turkey                   |
| Treuthardt |         | Cedric          | Lausanne                        | Switzerland              |
| Diego      | Martin  | Cecchini        | Buenos Aires                    | Argentina                |
| Oğuz       | Özden   | Cebeci          | Ankara                          | Turkey                   |
| Nelson     | A.      | Cayco           | Cabanatuan                      | Philippines              |
| Luis       | Augusto | Castro SãfâjDer | Barcelona                       | Spain                    |
| Octavio    | Augusto | Castillo        | Santiago                        | Chile                    |
| Daniele    | D       | Castellani      | Viterbo                         | Italy                    |
| Turhan     |         | Caskurlu        | Istanbul                        | Turkey                   |
| Biljana    | Luka    | Carevic         | Belgrade                        | Serbia and<br>Montenegro |
| Andrãfâ©   | Martins | Cardoso         | Matosinhos                      | Portugal                 |
| Enrique    |         | Cao Avellaneda  | Murcia (Murcia)                 | Spain                    |
| Yanwei     |         | Cao             | Qingdao                         | China                    |
| Zeynel     |         | Canogulları     | Turkey                          | Turkey                   |

|              |              |            |                  |                |
|--------------|--------------|------------|------------------|----------------|
| Josep        |              | Campa      | Gasteiz          | Spain          |
| Chibelean    | Bogdan       | Calin      | Bucharest        | Romania        |
| Emanuele     |              | Caldarera  | Palermo          | Italy          |
| Tiziana      |              | Calcagno   | Genova           | Italy          |
| Adriano      | Almeida      | Calado     | Recife           | Brazil         |
| Basri        |              | Çakıroğlu  | Istanbul         | Turkey         |
| Tommaso      |              | Cai        | Trento           | Italy          |
| Josa         | Pedro        | Cadilhe    | Viana Castelo    | Portugal       |
| Susana       | Gabriela     | Cabrera    | Montevideo       | Uruguay        |
| Juan         | Pablo        | Caballero  | Alicante         | Spain          |
|              |              |            |                  | Serbia and     |
| Xhemil       | Ramiz        | Bytyci     | Prishtina-Kosovo | Montenegro     |
| Istvã        |              | Buzogãny   | Budapest         | Hungary        |
| Joerg        |              | Busche     | Diepholz         | Germany        |
| Almudena     |              | Burillo    | Madrid           | Spain          |
| Stefan       |              | Buntrock   | Arendal          | Norway         |
| Burak        | Besir        | Bulut      | Kahramanmaras    | Turkey         |
| Hubert       |              | BUGEL      | ELBEUF           | France         |
|              |              |            |                  | Serbia and     |
| Igor         |              | Brzakovic  | Novi Sad         | Montenegro     |
| Franck       |              | Bruyere    | Tours            | France         |
| Sebastiano   |              | Bruschetta | Messina          | Italy          |
| Milos        |              | Brodak     | Hradec Kalove    | Czech Republic |
| Oliver       |              | Brock      | Hof              | Germany        |
| Elena        | Vladimirovna | Brizhatyuk | Novosibirsk      | Russia         |
| David        |              | Brix       | Wuerzburg        | Germany        |
| Konstantinos |              | Bratsas    | Haidari, Athens  | Greece         |
| Frederico    | A.D.         | Branco     | Porto            | Portugal       |
| Tommaso      |              | Brancato   | Albano Laziale   | Italy          |
| Ugur         |              | Boylu      | Istanbul         | Turkey         |
| Pierluigi    |              | Bove       | Rome             | Italy          |
| Philip       | S            | Bova       | Rostov-On-Don    | Russia         |
| Andreas      |              | Bourdoumis | Exeter           | United Kingdom |
| Amine        |              | Bouassida  | Lens             | France         |
| Henry        |              | Botto      | Suresnes         | France         |
| Nagy         |              | Botond     | Brasov           | Romania        |
| Francisco    | J. Santos    | Botelho    | Porto            | Portugal       |
| Pia          | Carla        | Bossola    | Domodossola      | Italy          |
| Ricardo      | G.           | Borges     | Coimbra          | Portugal       |
| Gernot       |              | Bonkat     | Basel            | Switzerland    |
| Giovanni     |              | Bonfiglio  | Catania          | Italy          |
| Ahmet        |              | Bolukbasi  | Izmir            | Turkey         |
| Jean-Paul    |              | Boiteux    | Clermont-Ferrand | France         |
| Sotirios     |              | Bogris     | London           | United Kingdom |
| Csaba        |              | BognãfãjR  | Miskolc          | Hungary        |
| Malte        |              | Boehm      | Dillenburg       | Germany        |

|            |              |                    |                 |                 |
|------------|--------------|--------------------|-----------------|-----------------|
| Katharina  |              | Boehm              | Hamburg         | Germany         |
| Balazs     |              | Bodrogi            | Miskolc         | Hungary         |
| Franco     |              | Blefari            | Orvieto         | Italy           |
| Brian      | Penero       | Blas               | Tacloban, Leyte | Philippines     |
| Truls      | Erik         | Bjerklund Johansen | Oslo            | Norway          |
| Jure       |              | Bizjak             | Ljubljana       | Slovenia        |
| Werner     | H            | Bischoff           | Backnang        | Germany         |
| Rasmus     |              | Bisbjerg           | Herlev          | Denmark         |
| Brian      | Robert       | Birch              | Southampton     | United Kingdom  |
| Renu       |              | Bharadwaj          | Pune            | India           |
| Aashutosh  |              | Bhanot             | Pleven          | Bulgaria        |
|            |              |                    | Uttam Plaza,    |                 |
| Shashikant | R            | Bhange             | Pune            | India           |
| Burkhard   |              | Beyer              | Hamburg         | Germany         |
| Ingrid     | H            | Berger             | Wien            | Austria         |
| Boris      | Vitalyevitch | Berejanski         | Moscow          | Russia          |
| Eduardo    |              | Bercowsky          | Menorca         | Spain           |
| Saida      |              | Benredjeb          | Tunis           | Tunisia         |
| Francesco  |              | Beniamin           | Treviso         | Italy           |
| Giuseppe   |              | Benedetto          | Padova          | Italy           |
| Nawfel     |              | Ben Rais           | Tunis           | Tunisia         |
| Payam      |              | BEHZADI            | Tehran          | Iran            |
| Selahattin |              | Bedir              | Ankara          | Turkey          |
| Jaroslav   |              | Beck               | Kosice          | Slovakia        |
|            |              |                    | Jerez De La     |                 |
| Pastora    |              | Beardo             | Frontera        | Spain           |
|            |              |                    |                 | Bosnia and      |
| Mustafa    |              | Bazardzanovic      | Tuzla           | Herzegovina     |
| Rıza       |              | Baysal             | Antalya         | Turkey          |
| Yildirim   |              | Bayazit            | Adana           | Turkey          |
| Mihir      | V            | Baxi               | Mumbai          | India           |
| Michael    |              | Baumann            | Hameln          | Germany         |
|            |              |                    |                 | Macedonia, The  |
|            |              |                    |                 | Former Yugoslav |
| Stojan     |              | Batandjiovski      | Bitola          | Republic of     |
|            |              |                    | Niteroi Rio De  |                 |
| Paulo      | Roberto      | Bastos             | Janeiro         | Brazil          |
| Ralf       | F.           | Basting            | Altoetting      | Germany         |
| Harry      |              | Bassaris           | Patras          | Greece          |
| Gediminas  |              | Baseckas           | Ystad           | Sweden          |
| Riccardo   |              | Bartoletti         | Pistoia         | Italy           |
| Joeri      |              | Barth              | Ghent           | Belgium         |
| Lyidmila   | Pavlovna     | Barashova          | Kemerovo        | Russia          |
| Caner      |              | BARAN              | Kahramanmaras   | Turkey          |
| Firuz      |              | Barakaev           | Moscow          | Russia          |
| Maria      | Del Carmen   | Bangher            | Corrientes      | Argentina       |



|              |               |              |                  |                                                                     |
|--------------|---------------|--------------|------------------|---------------------------------------------------------------------|
| Vladimir     | Mihailo       | Bancevic     | Belgrade         | Serbia and Montenegro<br>Macedonia, The Former Yugoslav Republic of |
| Goran        | Krume         | Balevski     | Ohrid            | Turkey                                                              |
| Melih        |               | Balci        | Ankara           | Turkey                                                              |
| Mehmet       |               | Balasar      | Konya            | United Kingdom                                                      |
| Mohammad     |               | Bakhtiar     | London           | Bosnia and Herzegovina                                              |
| Senad        |               | Bajramovic   | Sarajevo         | Hungary                                                             |
| Gabor        |               | Bajor        | Budapest         | Korea, South                                                        |
| Seung        |               | Baik         | Gwang-Ju         | Malaysia                                                            |
| Badrulhisham |               | Bahadzor     | Cheras, KL       | Sudan                                                               |
| Mohamed      | Alaa          | Bahaa        | Nyala            | Iran                                                                |
| Mahmood      | Reza          | Baghinia     | Arak             | Brazil                                                              |
| Marcos       | Alessandro    | Baeza        | Umuarama Pr      | Korea, South                                                        |
| Jae Hyun     |               | Bae          | Ansan            | France                                                              |
| Cãfã©Cile    |               | BACH         | Suresnes         | Denmark                                                             |
| Birgit       | Kaa           | Bach         | Aarhus N         | Denmark                                                             |
| Abdul        | Azim          | Azizi        | Herlev           | Romania                                                             |
| Olgun        |               | Azis         | Constanta        | Iran                                                                |
| Behrooz      | Rahnavardi    | Azari        | Bandar Abbas     | Turkey                                                              |
| Omer         |               | Aytac        | Istanbul         | Turkey                                                              |
| Serdar       |               | Aykan        | Istanbul         | Sweden                                                              |
| Elin         |               | Axen         | Gothenburg       | Pakistan                                                            |
| M Hammad     |               | Ather        | Karachi          | United Kingdom                                                      |
| Grigorios    |               | Athanasiadis | Guildford        | France                                                              |
| Muhammad     |               | ATFA         | Aulnay Sous Bois | Turkey                                                              |
| Ferhat       |               | Ates         | Istanbul         | Ghana                                                               |
| Henry        | None          | Atawurah     | Takoradi         | Uzbekistan                                                          |
| Rasul        | Akhmedjanovic | Ataniyazov   | Tashknet         | Turkey                                                              |
| Ali          | h             | Atan         | Ankara           | Turkey                                                              |
| Mehmet       | Kazim         | Asutay       | Istanbul         | Turkey                                                              |
| Mohamadali   |               | Aslmonadi    | Tabriz           | Iran                                                                |
| Yilmaz       |               | Aslan        | Ankara           | Turkey                                                              |
| Ergul        |               | Aslan        | Istanbul         | Turkey                                                              |
| Ahmet        | Ruknettin     | Aslan        | Istanbul         | Turkey                                                              |
| Ramazan      |               | Asci         | Samsun           | Turkey                                                              |
| Cagri        |               | Asan         | BATMAN           | Turkey                                                              |
| Montserrat   |               | Arzoz        | Badalona         | Spain                                                               |
| Levon        | Dm            | Arustamov    | Tashkent         | Uzbekistan                                                          |
| Burak        |               | Arslan       | Istanbul         | Turkey                                                              |
| Nasr         |               | Arsanious    | Croydon          | United Kingdom                                                      |
| Szanto       |               | Arpad        | Pecs             | Hungary                                                             |
| Athanasios   | N             | Argyropoulos | Elefsina         | Greece                                                              |

|                 |                |                |                  |                      |
|-----------------|----------------|----------------|------------------|----------------------|
| Manuel          | Alvarez        | Ardura         | Alcorcon, Madrid | Spain                |
| Ersan           |                | Arda           | Edirne           | Turkey               |
| Alejandro       |                | Arce           | Mexico           | Mexico               |
| Saeid           |                | Arasteh        | Bam              | Iran                 |
| Haykaz          |                | Antonyan       | Yerevan          | Armenia              |
| Abi Aad         |                | Antoine        | Brussels         | Belgium              |
| Javier          |                | Angulo         | Getafe, Madrid   | Spain                |
| Catarina        | Ingrid         | Aneman         | Goteborg         | Sweden               |
| Alexander       | Vladimirovich  | Andreychikov   | Krasnoyarsk      | Russia               |
| Elena           |                | Andretta       | Dolo (Venice)    | Italy                |
| Kim             | Hovgaard       | Andreassen     | Fredericia       | Denmark              |
| Anders          | Christian      | Andersson      | Limhamn          | Sweden               |
|                 |                |                | Copenhagen       |                      |
| Leif            | Percival       | Andersen       | Åfjöö            | Denmark              |
| Jens            | Thorup         | Andersen       | Roskilde         | Denmark              |
| Polvonov        | Abror          | Aminovich      | Samarkand        | Uzbekistan           |
| Miguel          |                | Alvarez-Mugica | Oviedo           | Spain                |
| S B Pavan Kumar |                | Aluru          | Sunderland       | United Kingdom       |
| Muammer         |                | Altok          | Izmir            | Turkey               |
| Mustafa         |                | Altindis       | Sakarya          | Turkey               |
| Javier          | David          | Altclas        | Buenos Aires     | Argentina            |
| Nayel           | Abdullah       | Altarawneh     | Doha             | Qatar                |
| Berthold        |                | Alt            | Fulda            | Germany              |
| Naimet          | Kamal          | Alsaigh        | Alain - Abudhabi | United Arab Emirates |
| Abdulmunem      | Mohammed       | Alsadi         | Dubai            | United Arab Emirates |
| Caner           |                | Alptekin       | Izmir            | Turkey               |
| Ahmed           | Mabrouk        | Alostia        | London           | United Kingdom       |
| Vafa            | Abd            | Allahpour      | Mahabad          | Iran                 |
| Ahmad           | Ashhab         | Alkadi         | Ryiad            | Saudi Arabia         |
| Ahmed           | Khalil         | Aljubory       | Mosul            | Iraq                 |
| Jakhongir       | Fatikhovich    | Alidjanov      | Tashkent         | Uzbekistan           |
| Tarek           |                | Ali            | Nyiregyhaza      | Hungary              |
| Arif            | Maqsood        | Ali            | Okara            | Pakistan             |
| Ahmed           | Ragab          | Ali            | Sharkia          | Egypt                |
| Ammar           |                | Alhasso        | Dunfermline      | United Kingdom       |
|                 | Mohammed       |                |                  |                      |
| Gamal           | Sami           | Alhadad        | Alexandria       | Egypt                |
| Naser           | Abdussalam     | Alfgi          | Tripoli          | Libya                |
| Shulyak         |                | Alexander      | Lviv             | Ukraine              |
| Egote           | Kofi           | Alexander      | Moscow           | Russia               |
| Dmitry          |                | Aleshin        | Brno             | Czech Republic       |
| Mohammad        | Khalil Ibrahim | Aldahiri       | Abu Dhabi        | United Arab Emirates |
| Emilio          | Lopez          | Alcina         | Valencia         | Spain                |
| Istvan          |                | Albert         | Budapest         | Hungary              |
| Zaheer          |                | Alam           | Karachi          | Pakistan             |
| Bulent          |                | ALAGOL         | Edirne           | Turkey               |

|               |             |             |                          |                |
|---------------|-------------|-------------|--------------------------|----------------|
| Muna          | Mohsen      | Al-Haidary  | Hodeidah                 | Yemen          |
| Kais          |             | Al-Dairi    | Chelmsford               | United Kingdom |
| Nahed         | Ahmad       | Al Tabash   | Taif                     | Saudi Arabia   |
| Riyadh        |             | Al Salh     | Dammam                   | Saudi Arabia   |
| Ilker         | -           | Akyol       | Istanbul                 | Turkey         |
| Sergey        | Dmitrievich | Aksionov    | Kiev                     | Ukraine        |
| Yigit         |             | Akin        | Antalya                  | Turkey         |
| Waseem        |             | Akhter      | London                   | United Kingdom |
| Hacã,,Â±      | Murat       | Akgãfâ¼L    | Istanbul                 | Turkey         |
| Ali           | Ferruh      | Akay        | Istnbul                  | Turkey         |
| Ulrike        |             | Ahrens      | Ulm                      | Germany        |
| Jae Hyun      |             | Ahn         | Yangsan-Si,<br>Gyeongnam | Korea, South   |
| Mumtaz        |             | Ahmad       | Rawalpindi               | Pakistan       |
| Christer      |             | Ahlstrand   | Linköping                | Sweden         |
| Reza          |             | Aghelnezhad | Mashhad                  | Iran           |
| Mehmet        |             | Oã,,Å, Lu   | Gaziantep                | Turkey         |
| Akisibadek    | Alekz       | Afoko       | Tamale                   | Ghana          |
| Vasileios     | Georgios    | Adamopoulos | Heraklio                 | Greece         |
| Przemyslaw    |             | Adamczyk    | Torun                    | Poland         |
| Iwan          | Asmara      | Achmad      | Jakarta                  | Indonesia      |
| Kamal         | Jamil       | Achkar      | Creil                    | France         |
| Ömer          |             | Acar        | Istanbul                 | Turkey         |
| Refaat        | Mohamad     | Abusamra    | Misrata                  | Libya          |
| Tarik         | Sulaiman    | Abulhul     | Tripoli                  | Libya          |
| Salisu        |             | Abubakar    | Kano                     | Nigeria        |
| Leif          |             | Abramsson   | Umeãfâ¥                  | Sweden         |
| Ernesto       | A           | Aboytes     | Celaya                   | Mexico         |
| Vitaly        | Eduardovich | Aboyan      | Rostov-On-Don            | Russia         |
| Mohamed       |             | Abo El-Enen | Tanta                    | Egypt          |
| Mohamed       | Ismat       | Abdulmajed  | Milton Keynes            | United Kingdom |
| Iskander      | Ilfakovich  | Abdullin    | Moscow                   | Russia         |
| Muthanna      | Saad        | Abduljawad  | Mosul                    | Iraq           |
| Bouzouita     |             | Abderrazak  | Tunis                    | Tunisia        |
| Amr           | Mahmoud     | Abdelhakim  | Cairo                    | Egypt          |
| Khaled        | Farid       | Abdel-Aziz  | Dallas                   | United States  |
| Hatem         | Mahrous     | Abdel Wahab | Cairo                    | Egypt          |
| Antonino      |             | Abbolito    | Roma                     | Italy          |
| Bruno         |             | Abbate      | Florence                 | Italy          |
| Malashchitsky | Dmitry      | A.          | Minsk                    | Belarus        |
